# Supplementary material for: Digging into the NGS Information from a Large-Scale South European Population with Metastatic/Unresectable Pancreatic Ductal Adenocarcinoma: A Real-World Genomic Depiction
Source: MDPI journal article supplement (doi:10.3390/cancers16010002), 2023-12-19
Supplement: s1 [file s1]

Supplementary Table S1. 513 panel gene list

| 206 full exon coverage and CNV Loss genes |              |              |              |               |              |               |                |               |              |
|-------------------------------------------|--------------|--------------|--------------|---------------|--------------|---------------|----------------|---------------|--------------|
| ABRAXA S1                                 | ACVR1B       | ACVR2A       | ADAMTS 12    | ADAMTS 2      | AMER1        | APC           | ARHGAP 35      | ARID1A        | ARID1B       |
| ARID2                                     | ARID5B       | ASXL1        | ASXL2        | <b>ATM</b>    | <b>ATR</b>   | <b>ATRX</b>   | AXIN1          | AXIN2         | B2M          |
| <b>BAP1</b>                               | <b>BARD1</b> | BCOR         | <b>BLM</b>   | BMPR2         | <b>BRCA1</b> | <b>BRCA2</b>  | <b>BRIP1</b>   | CASP8         | CBFB         |
| CD274                                     | CD276        | CDC73        | CDH1         | CDH10         | <b>CDK12</b> | CDKN1A        | CDKN1B         | CDKN2A        | CDKN2B       |
| CDKN2C                                    | <b>CHEK1</b> | <b>CHEK2</b> | CIC          | CREBBP        | CSMD3        | CTCF          | CTLA4          | CUL3          | CUL4A        |
| CUL4B                                     | CYLD         | CYP2C9       | DAXX         | DDX3X         | DICER1       | DNMT3A        | DOCK3          | DPYD          | DSC1         |
| DSC3                                      | ELF3         | ENO1         | EP300        | EPCAM         | EPHA2        | ERAP1         | ERAP2          | ERCC2         | ERCC4        |
| ERRF1                                     | ETV6         | <b>FANCA</b> | <b>FANCC</b> | <b>FANCD2</b> | <b>FANCE</b> | <b>FANCF</b>  | <b>FANCG</b>   | <b>FANCI</b>  | <b>FANCL</b> |
| <b>FANCM</b>                              | FAT1         | FBXW7        | FUBP1        | GATA3         | GNA13        | GPS2          | HDAC2          | HDAC9         | HLA-A        |
| HLA-B                                     | HNF1A        | INPP4B       | JAK1         | JAK2          | JAK3         | KDM5C         | KDM6A          | KEAP1         | KMT2A        |
| KMT2B                                     | KMT2C        | KMT2D        | LARP4B       | LATS1         | LATS2        | MAP2K4        | MAP2K7         | MAP3K1        | MAP3K4       |
| MAPK8                                     | MEN1         | MGA          | MLH1         | MLH3          | <b>MRE11</b> | MSH2          | MSH3           | MSH6          | MTAP         |
| MUTYH                                     | <b>NBN</b>   | NCOR1        | NF1          | NF2           | NOTCH1       | NOTCH2        | NOTCH3         | NOTCH4        | <b>PALB2</b> |
| PARP1                                     | PARP2        | PARP3        | PARP4        | PBRM1         | PDCD1        | PDCD1L        | PDIA3          | PGD           | PHF6         |
| PIK3R1                                    | PMS1         | PMS2         | POLD1        | POLE          | POT1         | PPM1D         | <b>PPP2R2A</b> | PRDM1         | PRDM9        |
| PRKAR1A                                   | PTCH1        | PTEN         | PTPRT        | <b>RAD50</b>  | <b>RAD51</b> | <b>RAD51B</b> | <b>RAD51C</b>  | <b>RAD51D</b> | <b>RAD52</b> |
| <b>RAD54L</b>                             | RASA1        | RASA2        | RB1          | RBM10         | RECQL4       | RNASEH2A      | RNASEH2B       | RNF43         | RPA1         |
| RUNX1                                     | SDHA         | SDHB         | SDHD         | SETD2         | SLX4         | SMAD2         | SMAD4          | SMARCA4       | SMARCB1      |
| SOX9                                      | SPEN         | STAG2        | STK11        | SUFU          | TAP1         | TAP2          | TBX3           | TCF7L2        | TET2         |
| TGFBR2                                    | TNFAIP3      | TNFRSF14     | TP53         | TP63          | TPP2         | TSC1          | TSC2           | USP9X         | VHL          |
| WT1                                       | <b>XRCC2</b> | <b>XRCC3</b> | ZFXH3        | ZMYM3         | ZRSR2        |               |                |               |              |
| 21 full exon coverage genes               |              |              |              |               |              |               |                |               |              |
| CALR                                      | CIITA        | CYP2D6       | ERCC5        | FAS           | ID3          | KLHL13        | MTUS2          | PSMB10        | PSMB8        |
| PSMB9                                     | RNASEH2C     | RPL22        | RPL5         | RUNX1T1       | SDHC         | SOCS1         | STAT1          | TMEM132D      | UGT1A1       |
| ZBTB20                                    |              |              |              |               |              |               |                |               |              |
| 108 Hotspot and CNV genes                 |              |              |              |               |              |               |                |               |              |
| ABL1                                      | ABL2         | AKT1         | AKT2         | AKT3          | ALK          | AR            | ARAF           | AURKA         | AURKC        |
| AXL                                       | BCL2         | BCL2L12      | BCL6         | BRAF          | CARD11       | CBL           | CCND1          | CCND2         | CCND3        |
| CCNE1                                     | CDK4         | CDK6         | CHD4         | DDR2          | EGFR         | EIF1AX        | ERBB2          | ERBB3         | ERBB4        |
| ESR1                                      | EZH2         | FAM135B      | FGFR1        | FGFR2         | FGFR3        | FGFR4         | FLT3           | FLT4          | FOXA1        |
| GATA2                                     | GNAS         | H3F3A        | H3F3B        | IDH2          | IKBKB        | IL7R          | KDR            | KIT           | KLF5         |
| KRAS                                      | MAGOH        | MAP2K1       | MAPK1        | MAX           | MDM4         | MECOM         | MEF2B          | MET           | MITF         |

|                                |        |           |          |           |         |         |          |          |        |
|--------------------------------|--------|-----------|----------|-----------|---------|---------|----------|----------|--------|
| MPL                            | MTOR   | MYC       | MYCN     | MYD88     | NFE2L2  | NRAS    | NTRK1    | NTRK3    | PCBP1  |
| PDGFRA                         | PDGFRB | PIK3C2B   | PIK3CA   | PIK3CB    | PIK3R2  | PIM1    | PLCG1    | PPP2R1A  | PPP6C  |
| PRKACA                         | PTPN11 | PXDNL     | RAC1     | RAF1      | RARA    | RET     | RHEB     | RICTOR   | RIT1   |
| ROS1                           | SETBP1 | SF3B1     | SLCO1B3  | SMC1A     | SMO     | SPOP    | SRC      | STAT3    | STAT6  |
| TERT                           | TOP1   | TPMT      | U2AF1    | USP8      | XPO1    | ZNF217  | ZNF429   |          |        |
| <b>61 hotspot genes</b>        |        |           |          |           |         |         |          |          |        |
| ACVR1                          | ATP1A1 | BCR       | BMP5     | BTK       | CACNA1D | CD79B   | CSF1R    | CTNNA1   | CUL1   |
| CYSLTR2                        | DGCR8  | DROSHA    | E2F1     | EPAS1     | FGF7    | FOXL2   | FOXO1    | GLI1     | GNA11  |
| GNAQ                           | HIF1A  | HIST1H2BD | HIST1H3B | HRAS      | IDH1    | IL6ST   | IRF4     | IRS4     | KLF4   |
| KNSTRN                         | MAP2K2 | MED12     | MYOD1    | NSD2      | NT5C2   | NTRK2   | NUP93    | PAX5     | PIK3CD |
| PIK3CG                         | PTPRD  | RGS7      | PIK3CD   | PIK3CG    | PTPRD   | RGS7    | RHOA     | RPL10    | SIX1   |
| SIX2                           | SNCAIP | SOS1      | SOX2     | SRSF2     | STAT5B  | TAF1    | TGFB1    | TRRAP    | TSHR   |
| WAS                            |        |           |          |           |         |         |          |          |        |
| <b>19 CNV Gain genes</b>       |        |           |          |           |         |         |          |          |        |
| ABCB1                          | CTNND2 | DDR1      | EMSY     | FGF19     | FGF23   | FGF3    | FGF4     | FGF9     | FYN    |
| GLI3                           | IGF1R  | MCL1      | MDM2     | MYCL      | RPS6KB1 | RPTOR   | YAP1     | YES1     |        |
| <b>86 TMB only genes</b>       |        |           |          |           |         |         |          |          |        |
| A1CF                           | ACSM2B | ADAM18    | ANO4     | ARMC4     | BRINP3  | C6      | C8A      | C8B      | CANX   |
| CASR                           | CD163  | CNTN6     | CNTNAP4  | CNTNAP5   | COL11A1 | DCAF4L2 | DCDC1    | GALNT17  | GPR158 |
| GRID2                          | HCN1   | HLA-C     | KCND2    | KCNH7     | KEL     | KIR3DL1 | KRTAP2-1 | KRTAP6-2 | LRRC7  |
| MARCO                          | NLRC5  | NOL4      | NRXN1    | NYAP2     | OR10G8  | OR2G6   | OR2L13   | OR2L2    | OR2L8  |
| OR2M3                          | OR2T3  | OR2T33    | OR2T4    | OR2W3     | OR4A15  | OR4C15  | OR4C6    | OR4M1    | OR4M2  |
| OR5D18                         | OR5F1  | OR5L1     | OR5L2    | OR6F1     | OR8H2   | OR8I2   | OR8U1    | ORC4     | PAK5   |
| PCDH17                         | PDE1A  | PDE1C     | PLXDC2   | POM121L12 | PPFIA2  | RBP3    | REG1A    | REG1B    | REG3A  |
| REG3G                          | RPTN   | RUNDC3B   | SH3RF2   | SLC15A2   | SLC8A1  | SYT10   | SYT16    | TAPBP    | TPTE   |
| TRHDE                          | TRIM48 | TRIM51    | ZIM3     | ZNF479    | ZNF536  |         |          |          |        |
| <b>51 Fusion drivers genes</b> |        |           |          |           |         |         |          |          |        |
| AKT2                           | ALK    | AR        | AXL      | BRAF      | BRCA1   | BRCA2   | CDKN2A   | EGFR     | ERBB2  |
| ERBB4                          | ERG    | ESR1      | ETV1     | ETV4      | ETV5    | FGFR1   | FGFR2    | FGFR3    | FGR    |
| FLT3                           | JAK2   | KRAS      | MDM4     | MET       | MYB     | MYBL1   | NF1      | NOTCH1   | NOTCH4 |
| NRG1                           | NTRK1  | NTRK2     | NTRK3    | NUTM1     | PDGFR A | PDGFRB  | PIK3CA   | PPARG    | PRKACA |
| PRKACB                         | PTEN   | RAD51B    | RAF1     | RB1       | RELA    | RET     | ROS1     | RSPO2    | RSPO3  |
| TERT                           |        |           |          |           |         |         |          |          |        |

\*\*Genes of the homologous recombination (HR) complex are in blue color

Supplementary Table S2. 513 panel gene list

| 87 hotspot genes        |              |               |              |               |               |               |               |              |         |
|-------------------------|--------------|---------------|--------------|---------------|---------------|---------------|---------------|--------------|---------|
| AKT1                    | AKT2         | AKT3          | ALK          | AR            | ARAF          | AXL           | BRAF          | BTK          | CBL     |
| CCND1                   | CDK4         | CDK6          | <b>CHEK2</b> | CSF1R         | CTNNB1        | DDR2          | EGFR          | ERBB2        | ERBB3   |
| ERBB4                   | ERCC2        | ESR1          | EZH2         | FGFR1         | FGFR2         | FGFR3         | FGFR4         | FLT3         | FOXL2   |
| GATA2                   | GNA11        | GNAQ          | GNAS         | H3F3A         | HIST1H3B      | HNF1A         | HRAS          | IDH1         | IDH2    |
| JAK1                    | JAK2         | JAK3          | KDR          | KIT           | KNSTRN        | KRAS          | MAGOH         | MAP2K1       | MAP2K2  |
| MAP2K4                  | MAPK1        | MAX           | MDM4         | MED12         | MET           | MTOR          | MYC           | MYCN         | MYD88   |
| NFE2L2                  | NRAS         | NTRK1         | NTRK2        | NTRK3         | PDGFRA        | PDGFRB        | PIK3CA        | PIK3CB       | PPP2R1A |
| PTPN11                  | RAC1         | RAF1          | RET          | RHEB          | RHOA          | ROS1          | SF3B1         | SMAD4        | SMO     |
| SPOP                    | SRC          | STAT3         | TERT         | TOP1          | U2AF1         | XPO1          |               |              |         |
| 48 full exon coverage   |              |               |              |               |               |               |               |              |         |
| ARID1A                  | <b>ATM</b>   | <b>ATR</b>    | <b>ATR</b>   | <b>ATR</b>    | <b>BAP1</b>   | <b>BRCA1</b>  | <b>BRCA2</b>  | CDK12        | CDKN2A  |
| CDKN2B                  | <b>CHEK1</b> | CREBBP        | <b>FANCA</b> | <b>FANCD2</b> | <b>FANCI</b>  | FBXW7         | MLH1          | <b>MRE11</b> | MSH2    |
| MSH6                    | <b>NBN</b>   | NF1           | NF2          | NOTCH1        | NOTCH2        | NOTCH3        | <b>PALB2</b>  | PIK3R1       | PMS2    |
| POLE                    | PTCH1        | PTEN          | <b>RAD50</b> | <b>RAD51</b>  | <b>RAD51C</b> | <b>RAD51D</b> | <b>RAD51B</b> | RB1          | RNF43   |
| SETD2                   | SLX4         | SMARCA4       | SMARCB1      | STK11         | TP53          | TSC1          | TSC2          |              |         |
| 43 copy number variants |              |               |              |               |               |               |               |              |         |
| AKT1                    | AKT2         | AKT3          | ALK          | AR            | AXL           | BRAF          | CCND1         | CCND2        | CCND3   |
| CCNE1                   | CDK2         | CDK4          | CDK6         | EGFR          | ERBB2         | ESR1          | FGF19         | FGF3         | FGFR1   |
| FGFR2                   | FGFR3        | FGFR4         | FLT3         | IGF1R         | KIT           | KRAS          | MDM2          | MDM4         | MET     |
| MYC                     | MYCL         | MYCN          | NTRK1        | NTRK2         | NTRK3         | PDGFRA        | PDGFRB        | PIK3CA       | PIK3CB  |
| PPARG                   | RICTOR       | TERT          |              |               |               |               |               |              |         |
| 51 fusion drivers       |              |               |              |               |               |               |               |              |         |
| AKT2                    | ALK          | AR            | AXL          | BRAF          | <b>BRCA1</b>  | <b>BRCA2</b>  | CDKN2A        | EGFR         | ERBB2   |
| ERBB4                   | ERG          | ESR1          | ETV1         | ETV4          | ETV5          | FGFR1         | FGFR2         | FGFR3        | FGR     |
| FLT3                    | JAK2         | KRAS          | MDM4         | MET           | MYB           | MYBL1         | NF1           | NOTCH1       | NOTCH4  |
| NRG1                    | NTRK1        | NTRK2         | NTRK3        | NUTM1         | PDGFRA        | PDGFRB        | PIK3CA        | PPARG        | PRKACA  |
| PRKACB                  | PTEN         | <b>RAD51B</b> | RAF1         | RB1           | RELA          | RET           | ROS1          | RSPO2        | RSPO3   |
| TERT                    |              |               |              |               |               |               |               |              |         |

\*\*Genes of the homologous recombination (HR) complex are in blue color

Supplementary Table S3. Study population and biomarkers' results obtained

| Patient  | Age | Gender | NGS results           | PD-L1 | TMB | MSI |
|----------|-----|--------|-----------------------|-------|-----|-----|
| <u>1</u> | 39  | Female | KRAS:c.35G>A (p.G12D) |       |     |     |
| <u>2</u> | 68  | Female |                       |       |     |     |

|           |    |        |                                                                                                                                                 |  |  |  |
|-----------|----|--------|-------------------------------------------------------------------------------------------------------------------------------------------------|--|--|--|
| <u>3</u>  | 57 | Male   | KRAS:c.35G>A (p.G12D) ERBB2:c.1998_1999 delCT (p.L667fs*36) CDKN2A:c.83_100delTGCGGGCGCTGCTGGAG G (-) TP53:c.818G>A (p.R273H)                   |  |  |  |
| <u>4</u>  | 60 | Female | TP53:c.380C>A (p.Ser127Tyr)                                                                                                                     |  |  |  |
| <u>5</u>  | 61 | Male   |                                                                                                                                                 |  |  |  |
| <u>6</u>  | 64 | Male   |                                                                                                                                                 |  |  |  |
| <u>7</u>  | 36 | Female | KRAS:c.35G>A (p.G12D) TP53:c.796G>A (p.G266R) CCNE1:Amplification                                                                               |  |  |  |
| <u>8</u>  | 61 | Male   | FGFR4:Amplification                                                                                                                             |  |  |  |
| <u>9</u>  | 60 | Female | KRAS:c.34G>C (p.Gly12Arg) TP53:c.817C>T (p.Arg273Cys)                                                                                           |  |  |  |
| <u>10</u> | 71 | Male   | TP53:c.607G>A (p.Val203Met)                                                                                                                     |  |  |  |
| <u>11</u> | 38 | Male   | TP53:c.557A>G (p.D186G)                                                                                                                         |  |  |  |
| <u>12</u> | 48 | Male   | KRAS:c.35G>A (p.Gly12Asp) TP53:c.215_216 insG (p.Val73fs)                                                                                       |  |  |  |
| <u>13</u> | 63 | Male   | KRAS:c.35G>A (p.Gly12Asp) TP53:c.430C>T (p.Gln144Ter)                                                                                           |  |  |  |
| <u>14</u> | 64 | Female | KRAS:c.35G>A (p.Gly12Asp)                                                                                                                       |  |  |  |
| <u>15</u> | 54 | Male   | KRAS:c.35G>T (p.Gly12Val) TP53:c.532C>T (p.His178Tyr) ATM:c.9022C>T (p.Arg3008Cys) TSC1:c.433C>T (p.Gln145Ter) CREBBP:c.6019 C>T (p.Gln2007Ter) |  |  |  |

|           |    |        |                                                                                                                                                             |                                        |       |                 |
|-----------|----|--------|-------------------------------------------------------------------------------------------------------------------------------------------------------------|----------------------------------------|-------|-----------------|
| <u>16</u> | 69 | Male   | KRAS:c.35G>T (p.Gly12Val)                                                                                                                                   |                                        |       |                 |
| <u>17</u> | 48 | Male   | KRAS:c.35G>T (p.Gly12Val)                                                                                                                                   |                                        |       |                 |
| <u>18</u> | 51 | Male   | TSC2:c.2380C>T<br>(p.Q794*) STK11:c.465-<br>1G>A STK11:c.465-1G>A                                                                                           |                                        | 32,24 |                 |
| <u>19</u> | 65 | Female | KRAS:c.35G>A<br>(p.Gly12Asp) RNF43:c.2057_2<br>058insG<br>(p.Ser687fs) Microsatellite<br>Instability (MSI):STABLE<br>(MSS) PD-L1<br>expression:negative <1% | negative <br><1%                       | 7,93  | STABLE<br>(MSS) |
| <u>20</u> | 67 | Male   | KRAS:c.35G>T (p.Gly12Val)                                                                                                                                   |                                        | fail  |                 |
| <u>21</u> | 59 | Female | KRAS:c.35G>A<br>(p.Gly12Asp) Microsatellite<br>Instability (MSI):STABLE<br>(MSS) PD-L1<br>expression:negative<br>insufficient material                      | negative  i<br>nsufficient<br>material | 12,2  | STABLE<br>(MSS) |
| <u>22</u> | 47 | Female | KRAS:c.35G>A<br>(p.Gly12Asp) TP53:c.706T>A<br>(p.Tyr236Asn)                                                                                                 |                                        | 11,81 |                 |
| <u>23</u> | 45 | Female | KRAS:c.35G>T (p.Gly12Val)                                                                                                                                   |                                        | 45,21 |                 |
| <u>24</u> | 81 | Female | TP53:c.743G>A<br>(p.Arg248Gln) Microsatellite<br>Instability (MSI):STABLE<br>(MSS) PD-L1<br>expression:negative <1%                                         | negative <br><1%                       | 13,17 | STABLE<br>(MSS) |
| <u>25</u> | 63 | Male   | KRAS:c.35G>A (p.Gly12Asp)                                                                                                                                   |                                        | 18,11 |                 |
| <u>26</u> | 62 | Male   | KRAS:c.35G>A<br>(p.Gly12Asp) TP53:c.823delT<br>(p.Cys275fs)                                                                                                 |                                        | 14,1  |                 |

|           |    |        |                                                                                                                                       |                                  |       |              |
|-----------|----|--------|---------------------------------------------------------------------------------------------------------------------------------------|----------------------------------|-------|--------------|
| <u>27</u> | 73 | Male   | KRAS:c.34_35delGGinsCT (p.G12L) CDK12:c.3283delG (p.E1095fs) Microsatellite Instability (MSI):STABLE (MSS) PD-L1 expression:fail fail | fail fail                        | 21,67 | STABLE (MSS) |
| <u>28</u> | 55 | Male   | TP53:c.517G>A (p.Val173Met) Microsatellite Instability (MSI):STABLE (MSS) PD-L1 expression:fail fail                                  | fail fail                        | 18,08 | STABLE (MSS) |
| <u>29</u> | 67 | Male   | KRAS:c.37G>T (p.Gly13Cys)                                                                                                             |                                  | 19,03 |              |
| <u>30</u> | 63 | Male   | KRAS:c.183A>C (p.Gln61His) TP53:c.646G>A (p.Val216Met) Microsatellite Instability (MSI):STABLE (MSS) PD-L1 expression:negative <1%    | negative  <1%                    | 18,97 | STABLE (MSS) |
| <u>31</u> | 71 | Female | KRAS:c.35G>T (p.Gly12Val) SMARCA4:c.293 5C>T (p.Arg979Ter)                                                                            |                                  | 13,1  |              |
| <u>32</u> | 78 | Male   | KRAS:c.35G>A (p.Gly12Asp) PIK3R1:c.211G> T (p.Gly71Ter)                                                                               |                                  | 22,27 |              |
| <u>33</u> | 53 | Female | Microsatellite Instability (MSI):STABLE (MSS) PD-L1 expression:negative insufficient material                                         | negative  i nsufficient material | 20,99 | STABLE (MSS) |
| <u>34</u> | 58 | Male   | TP53:c.532C>T (p.His178Tyr)                                                                                                           |                                  | 1,16  |              |

|           |    |        |                                                                                                                                                                                 |                  |       |                        |
|-----------|----|--------|---------------------------------------------------------------------------------------------------------------------------------------------------------------------------------|------------------|-------|------------------------|
| <u>35</u> | 68 | Male   | KRAS:c.35G>A<br>(p.Gly12Asp) CDKN2A:c.221deA<br>(p.Leu74fs) TP53:c.659A>G<br>(p.Tyr220Cys) Microsatellite<br>Instability (MSI):STABLE<br>(MSS) PD-L1<br>expression:positive 25% | positive 2<br>5% | 25,01 | STABLE<br>(MSS)        |
| <u>36</u> | 44 | Female | KRAS:c.35G>T<br>(p.Gly12Val) CDKN2A:c.233_2<br>34delTC<br>(p.Leu78fs) RNF43:c.2057_20<br>58insG (p.Ser687fs)                                                                    |                  | 32,1  |                        |
| <u>37</u> | 50 | Male   | KRAS:c.34G>C<br>(p.Gly12Arg) TP53:c.527G>T<br>(p.Cys176Phe)                                                                                                                     |                  | 23,76 |                        |
| <u>38</u> | 77 | Female | KRAS:c.35G>T<br>(p.Gly12Val) POLE:c.6649C>T<br>(p.Gln2217Ter)                                                                                                                   |                  | 23,69 |                        |
| <u>39</u> | 68 | Female | KRAS:c.35G>A<br>(p.Gly12Asp) TP53:c.646G>A<br>(p.Val216Met)                                                                                                                     |                  | 2,72  |                        |
| <u>40</u> | 28 | Female | PIK3CA:c.3140A>G<br>(p.H1047R) MSH2:Loss<br>(Oncogenic<br>Mutations) Microsatellite<br>Instability (MSI):HIGH (MSI-<br>High) PD-L1<br>expression:positive 60%                   | positive 6<br>0% | 13,45 | HIGH<br>(MSI-<br>High) |
| <u>41</u> | 47 | Male   | TP53:c.211_220delCCCCCGT<br>GG (p.Pro72fs)                                                                                                                                      |                  | 2,8   |                        |
| <u>42</u> | 68 | Male   | Microsatellite Instability<br>(MSI):STABLE (MSS) PD-L1<br>expression:negative <1%                                                                                               | negative <br><1% | 12,4  | STABLE<br>(MSS)        |
| <u>43</u> | 80 | Female | KRAS:c.35G>T (p.Gly12Val)                                                                                                                                                       |                  | 3,6   |                        |

|           |    |        |                                                                                                                                      |               |      |              |
|-----------|----|--------|--------------------------------------------------------------------------------------------------------------------------------------|---------------|------|--------------|
| <u>44</u> | 68 | Male   | PALB2:c.1037_1041delAAGAA (p.Lys346Thrfs)                                                                                            |               | 8,03 |              |
| <u>45</u> | 48 | Male   | KRAS:c.35G>A (p.Gly12Asp)  Microsatellite Instability (MSI):STABLE (MSS)  PD-L1 expression:positive 2%                               | positive  2 % | 6,8  | STABLE (MSS) |
| <u>46</u> | 80 | Male   | KRAS:c.35G>A (p.Gly12Asp)  TP53:c.818G>A (p.Arg273His)  Microsatellite Instability (MSI):STABLE (MSS)  PD-L1 expression:negative <1% | negative  <1% | 0,94 | STABLE (MSS) |
| <u>47</u> | 75 | Male   | KRAS:c.35G>A (p.Gly12Asp)                                                                                                            |               | 4,44 |              |
| <u>48</u> | 57 | Male   |                                                                                                                                      |               | 1,68 |              |
| <u>49</u> | 54 | Female | KRAS:c.34G>C (p.Gly12Arg)                                                                                                            |               | 4,52 |              |
| <u>50</u> | 51 | Female | KRAS:c.35G>T (p.Gly12Val)  Microsatellite Instability (MSI):STABLE (MSS)  PD-L1 expression:negative <1%                              | negative  <1% | fail | STABLE (MSS) |
| <u>51</u> | 44 | Male   | KRAS:c.34G>C (p.Gly12Arg)  TP53:c.916C>T (p.Arg306Ter)  Microsatellite Instability (MSI):STABLE (MSS)  PD-L1 expression:fail fail    | fail  fail    | 9,05 | STABLE (MSS) |
| <u>52</u> | 67 | Male   | KRAS:c.34G>C (p.Gly12Arg)                                                                                                            |               | 5,18 |              |

|           |    |        |                                                                                                                                                                      |               |       |              |
|-----------|----|--------|----------------------------------------------------------------------------------------------------------------------------------------------------------------------|---------------|-------|--------------|
| <u>53</u> | 43 | Male   | KRAS:c.38G>A (p.Gly13Asp)  TP53:c.524G>A (p.Arg175His)  Microsatellite Instability (MSI):STABLE (MSS)  PD-L1 expression:negative <1%                                 | negative  <1% | 12,74 | STABLE (MSS) |
| <u>54</u> | 52 | Male   | KRAS:c.34G>C (p.Gly12Arg)                                                                                                                                            |               | 6     |              |
| <u>55</u> | 58 | Female | FGFR1 fusion:WHSC1L1(1)-FGFR1(2)  Microsatellite Instability (MSI):STABLE (MSS)  PD-L1 expression:negative <1%                                                       | negative  <1% | 3,4   | STABLE (MSS) |
| <u>56</u> | 53 | Female | KRAS:c.35G>T (p.Gly12Val)  SLX4:c.212C>G (p.Ser71Ter)  TP53:c.743G>A (p.Arg248Gln)  PPARG fusion:TSEN2(5)-PPARG(4)                                                   |               | 1,52  |              |
| <u>57</u> | 61 | Female | KRAS:c.35G>A (p.Gly12Asp)                                                                                                                                            |               | 2,97  |              |
| <u>58</u> | 59 | Male   | KRAS:c.35G>A (p.Gly12Asp)  TP53:c.725G>T (p.Cys242Phe)  RSPO2 fusion:EIF3E(1)-RSPO2(2)  Microsatellite Instability (MSI):STABLE (MSS)  PD-L1 expression:positive 30% | positive  30% | 5,44  | STABLE (MSS) |
| <u>59</u> | 66 | Female | KRAS:c.35G>A (p.Gly12Asp)  CDKN2A:c.172C>T (p.Arg58Ter)  TP53:c.818G>A (p.Arg273His)                                                                                 |               | 4,2   |              |

|           |    |        |                                                                                                                                                                                                                                  |                         |       |              |
|-----------|----|--------|----------------------------------------------------------------------------------------------------------------------------------------------------------------------------------------------------------------------------------|-------------------------|-------|--------------|
| <u>60</u> | 51 | Male   | FANCA:c.3094C>T (p.Gln1032Ter)  KRAS:c.35G>A (p.Gly12Asp)  STK11:c.923G>A (p.Trp308Ter)  STK11:c.923G>A (p.Trp308Ter)  TP53:c.310C>T (p.Gln104Ter)  Microsatellite Instability (MSI):STABLE (MSS)  PD-L1 expression:negative <1% | negative  <1%           | fail  | STABLE (MSS) |
| <u>61</u> | 73 | Female | KRAS:c.35G>T (p.Gly12Val)  PIK3CA:c.3139C>T (p.His1047Tyr)                                                                                                                                                                       |                         | 20    |              |
| <u>62</u> | 39 | Male   | PALB2:c.1140_1143delTCTT (p.Ser380fs)                                                                                                                                                                                            |                         | 0,9   |              |
| <u>63</u> | 49 | Male   | TP53:c.916C>T (p.Arg306Ter)                                                                                                                                                                                                      |                         | 9,4   |              |
| <u>64</u> | 64 | Female | KRAS:c.35G>T (p.Gly12Val)                                                                                                                                                                                                        |                         | 29,6  |              |
| <u>65</u> | 65 | Female | KRAS:c.35G>A (p.Gly12Asp)  TP53:c.731G>T (p.Gly244Val)  Microsatellite Instability (MSI):STABLE (MSS)  PD-L1 expression:positive TC 15%, IC 1%                                                                                   | positive  TC 15%, IC 1% | 4,33  | STABLE (MSS) |
| <u>66</u> | 58 | Male   | KRAS:c.35G>T (p.Gly12Val)  CDKN2A:c.7G>T (p.Glu27Ter)  TP53:c.646G (p.Val216Leu)  Microsatellite Instability (MSI):STABLE (MSS)  PD-L1 expression:positive TC<1%, IC<1%                                                          | positive  TC<1%, IC<1%  | 10,81 | STABLE (MSS) |
| <u>67</u> | 73 | Male   |                                                                                                                                                                                                                                  |                         | 4,05  |              |

|           |    |        |                                                                                                                                                                |                                |       |                 |
|-----------|----|--------|----------------------------------------------------------------------------------------------------------------------------------------------------------------|--------------------------------|-------|-----------------|
| <u>68</u> | 59 | Female | KRAS:c.35G>A<br>(p.Gly12Asp) SMAD4:c.1576G<br>>T<br>(p.Glu526Ter) TP53:c.733G>A<br>(p.Gly245Ser)                                                               |                                | 18,59 |                 |
| <u>69</u> | 71 | Male   | KRAS:c.35G>A<br>(p.Gly12Asp) TP53:c.524G>A<br>(p.Arg175His) Microsatellite<br>Instability (MSI):STABLE<br>(MSS) PD-L1<br>expression:positive TC<1%, IC<br>5%   | positive T<br>C<1%, IC<br>5%   | 4,02  | STABLE<br>(MSS) |
| <u>70</u> | 61 | Male   | MLH1:c.1292_1293insC<br>(p.Met431fs) FBXW7:c.1629_<br>1630delAG<br>(p.Arg543fs) FBXW7:c.1099C><br>T<br>(p.Arg367Ter) CDKN2B:c.244<br>C>T (p.Arg82Ter)          |                                |       |                 |
| <u>71</u> | 71 | Male   | KRAS:c.34G>C (p.Gly12Arg)                                                                                                                                      |                                | 6,13  |                 |
| <u>72</u> | 54 | Male   | KRAS:c.38G>A<br>(p.Gly13Asp) TP53:c.742C>T<br>(p.Arg248Trp) Microsatellite<br>Instability (MSI):STABLE<br>(MSS) PD-L1<br>expression:positive TC>10%,<br>IC>50% | positive T<br>C>10%,<br>IC>50% | 3,65  | STABLE<br>(MSS) |
| <u>73</u> | 41 | Male   | KRAS:c.35G>A (p.Gly12Asp)                                                                                                                                      |                                |       |                 |
| <u>74</u> | 61 | Female | KRAS:c.34G>C (p.Gly12Arg)                                                                                                                                      |                                |       |                 |
| <u>75</u> | 80 | Male   | KRAS:c.35G>A (p.Gly12Asp)                                                                                                                                      |                                |       |                 |
| <u>76</u> | 57 | Male   | KRAS:c.183A>C (p.Gln61His)                                                                                                                                     |                                |       |                 |

|           |    |        |                                                                                                                                                                                 |                               |       |                 |
|-----------|----|--------|---------------------------------------------------------------------------------------------------------------------------------------------------------------------------------|-------------------------------|-------|-----------------|
| <u>77</u> | 73 | Male   | KRAS:c.35G>T<br>(p.Gly12Val) TP53:c.577C>T<br>(p.His193Tyr) Microsatellite<br>Instability (MSI):STABLE<br>(MSS) PD-L1<br>expression:positive TC <1%, IC<br>1%                   | positive T<br>C <1%, IC<br>1% | 8,32  | STABLE<br>(MSS) |
| <u>78</u> | 70 | Male   | KRAS:c.35G>T<br>(p.Gly12Val) Microsatellite<br>Instability (MSI):STABLE<br>(MSS) PD-L1<br>expression:negative IC<1%                                                             | negative I<br>C<1%            | 27,31 | STABLE<br>(MSS) |
| <u>79</u> | 84 | Female | NF2:c.1331C>A<br>(p.Ser444Ter) NF2:c.1294G>T<br>(p.Glu432Ter) TP53:c.817C>T<br>(p.Arg273Cys) MYC:Amplifica<br>tion                                                              |                               | 25,45 |                 |
| <u>80</u> | 69 | Male   | KRAS:c.35G>A<br>(p.Gly12Asp) TP53:c.480_496<br>delGGCTCTAAGGT<br>(p.Met160fs) Microsatellite<br>Instability (MSI):STABLE<br>(MSS) PD-L1<br>expression:positive TC 10%,<br>IC<1% | positive T<br>C 10%,<br>IC<1% | 5,18  | STABLE<br>(MSS) |
| <u>81</u> | 58 | Male   | KRAS:c.35G>A<br>(p.Gly12Asp) TP53:c.839G>C<br>(p.Arg280Thr)                                                                                                                     |                               | 12,85 |                 |
| <u>82</u> | 57 | Male   | Microsatellite Instability<br>(MSI):STABLE (MSS) PD-L1<br>expression:negative ncelled                                                                                           | negative <br>ncelled          | 2,57  | STABLE<br>(MSS) |
| <u>83</u> | 57 | Female |                                                                                                                                                                                 |                               |       |                 |
| <u>84</u> | 61 | Male   | KRAS:c.34G>T<br>(p.Gly12Cys) TP53:c.524G>A<br>(p.Arg175His)                                                                                                                     |                               |       |                 |

|           |    |        |                                                                                                                                                                 |                               |      |                 |
|-----------|----|--------|-----------------------------------------------------------------------------------------------------------------------------------------------------------------|-------------------------------|------|-----------------|
| <u>85</u> | 55 | Male   | KRAS:c.35G>A<br>(p.Gly12Asp) PIK3CA:c.1633G>A<br>(p.Glu545Lys) TP53:c.524G>A<br>(p.Arg175His)                                                                   |                               |      |                 |
| <u>86</u> | 56 | Male   | KRAS:c.35G>A<br>(p.Gly12Asp) MET<br>fusion:MET(13)-<br>MET(15) Microsatellite<br>Instability (MSI):STABLE<br>(MSS) PD-L1<br>expression:positive TC<1%,<br>IC<1% | negative <br>TC<1%,<br>IC<1%  | fail | STABLE<br>(MSS) |
| <u>87</u> | 67 | Male   | KRAS:c.35G>A<br>(p.Gly12Asp) Microsatellite<br>Instability (MSI):STABLE<br>(MSS) PD-L1<br>expression:negative TC<1%,<br>IC<1%                                   | negative <br>TC<1%,<br>IC<1%  | 9,35 | STABLE<br>(MSS) |
| <u>88</u> | 55 | Male   | KRAS:c.35G>A<br>(p.Gly12Asp) Microsatellite<br>Instability (MSI):STABLE<br>(MSS) PD-L1<br>expression:positive TC 1%,<br>IC<1%                                   | positive T<br>C 1%,<br>IC<1%  | 2,54 | STABLE<br>(MSS) |
| <u>89</u> | 64 | Female | KRAS:c.35G>A<br>(p.Gly12Asp) Microsatellite<br>Instability (MSI):STABLE<br>(MSS) PD-L1<br>expression:positive TC<1%, IC<br>20%                                  | positive T<br>C<1%, IC<br>20% | 1,72 | STABLE<br>(MSS) |
| <u>90</u> | 63 | Male   | KRAS:c.35G>T<br>(p.Gly12Val) TP53:c.566_567i<br>nsCCCT (p.Gln192fs)                                                                                             |                               |      |                 |
| <u>91</u> | 64 | Female | KRAS:c.35G>A<br>(p.Gly12Asp) PIK3CA:c.331A><br>G<br>(p.Lys111Glu) CDKN2A:c.172<br>C>T<br>(p.Arg58Ter) TP53:c.472C>G<br>(p.Arg158Gly)                            |                               | 3,97 |                 |

|            |    |        |                                                                                                                                                                               |                        |       |              |
|------------|----|--------|-------------------------------------------------------------------------------------------------------------------------------------------------------------------------------|------------------------|-------|--------------|
| <u>92</u>  | 71 | Female | KRAS:c.34G>C (p.Gly12Arg) CDKN2A:c.47_50delTGGC (p.Leu16fs) TP53:c.743G>A (p.Arg248Gln) Microsatellite Instability (MSI):STABLE (MSS) PD-L1 expression:positive TC<1%, IC 20% | positive TC<1%, IC 20% | 11,14 | STABLE (MSS) |
| <u>93</u>  | 73 | Female | KRAS:c.35G>T (p.Gly12Val)                                                                                                                                                     |                        |       |              |
| <u>94</u>  | 56 | Male   | KRAS:c.35G>A (p.Gly12Asp) TP53:c.578A>G (p.His193Arg) Microsatellite Instability (MSI):STABLE (MSS) PD-L1 expression:positive TC<1%, IC 25%                                   | positive TC<1%, IC 25% | 2,57  | STABLE (MSS) |
| <u>95</u>  | 44 | Female | KRAS:c.35G>A (p.Gly12Asp) Microsatellite Instability (MSI):STABLE (MSS) PD-L1 expression:positive TC1%, IC<1%                                                                 | positive TC1%, IC<1%   | 8,03  | STABLE (MSS) |
| <u>96</u>  | 45 | Male   | Microsatellite Instability (MSI):STABLE (MSS) PD-L1 expression:negative TC<1%, IC<1%                                                                                          | negative TC<1%, IC<1%  | 18,38 | STABLE (MSS) |
| <u>97</u>  | 73 | Male   | KRAS:c.35G>T (p.Gly12Val)                                                                                                                                                     |                        |       |              |
| <u>98</u>  | 68 | Male   | KRAS:c.183A>C (p.Gln61His) TP53:c.524G>A (p.Arg175His) ERBB2:Amplification                                                                                                    |                        |       |              |
| <u>99</u>  | 61 | Male   |                                                                                                                                                                               |                        | 14,63 |              |
| <u>100</u> | 72 | Male   | KRAS:c.35G>T (p.Gly12Val) CDKN2A:c.135_138delTCGG (p.Arg46fs)                                                                                                                 |                        |       |              |
| <u>101</u> | 72 | Female | KRAS:c.34G>C (p.Gly12Arg)                                                                                                                                                     |                        |       |              |

|            |    |        |                                                                                                                                                                                                       |                               |      |                 |
|------------|----|--------|-------------------------------------------------------------------------------------------------------------------------------------------------------------------------------------------------------|-------------------------------|------|-----------------|
| <u>102</u> | 65 | Male   | KRAS:c.35G>A<br>(p.Gly12Asp) ARID1A:c.646deA<br>(p.Ser2156fs) TP53:c.742C>T<br>(p.Arg248Trp)                                                                                                          |                               |      |                 |
| <u>103</u> | 51 | Male   | KRAS:c.35G>T<br>(p.Gly12Val) TP53:c.526T>A (-<br>) : :                                                                                                                                                |                               |      |                 |
| <u>104</u> | 57 | Female | KRAS:c.35G>A<br>(p.Gly12Asp) CDKN2A:c.247C<br>>T<br>(p.His83Tyr) TP53:c.226_227i<br>nsG (p.Ala76fs) Microsatellite<br>Instability (MSI):STABLE<br>(MSS) PD-L1<br>expression:positive TC 10%, IC<br>1% | positive T<br>C 10%, IC<br>1% | 6,12 | STABLE<br>(MSS) |
| <u>105</u> | 53 | Female | NBN:c.657_661delACAAA<br>(p.Lys219Asnfs*16)                                                                                                                                                           |                               |      |                 |
| <u>106</u> | 56 | Female | KRAS:c.35G>T<br>(p.Gly12Val) STK11:c.464+1G<br>>A STK11:c.464+1G>A                                                                                                                                    |                               |      |                 |
| <u>107</u> | 80 | Male   | KRAS:c.35G>A<br>(p.Gly12Asp) TP53:c.586C>T<br>(p.Arg196Ter) TP53:c.173delC<br>(p.Pro58fs)                                                                                                             |                               |      |                 |
| <u>108</u> | 64 | Male   | KRAS:c.35G>T<br>(p.Gly12Val) TP53:c.577C>T<br>(p.His193Tyr)                                                                                                                                           |                               |      |                 |
| <u>109</u> | 67 | Female | KRAS:c.35G>T<br>(p.Gly12Val) TP53:c.832C>T<br>(p.Pro278Ser)                                                                                                                                           |                               |      |                 |
| <u>110</u> | 54 | Male   | KRAS:c.34G>C<br>(p.Gly12Arg) KRAS:amplificati<br>on MYC:amplification CCND3<br>:amplification                                                                                                         |                               |      |                 |
| <u>111</u> | 60 | Male   | KRAS:c.35G>A<br>(p.Gly12Asp) TP53: c.833C>T<br>(p.Pro278Leu)                                                                                                                                          |                               |      |                 |
| <u>112</u> | 66 | MAle   | KRAS:c.35G>A<br>(p.Gly12Asp) GNAS:c.602G>A<br>(p.Arg201His)                                                                                                                                           |                               |      |                 |

|            |    |        |                                                                                                                                                                                                                                                                                                |                              |      |     |
|------------|----|--------|------------------------------------------------------------------------------------------------------------------------------------------------------------------------------------------------------------------------------------------------------------------------------------------------|------------------------------|------|-----|
| <u>113</u> | 64 | Male   |                                                                                                                                                                                                                                                                                                |                              |      |     |
| <u>114</u> | 62 | Female | KRAS:c.35G>T (p.Gly12Val)                                                                                                                                                                                                                                                                      |                              |      |     |
| <u>115</u> | 54 | Male   | KRAS:c.35G>T<br>(p.Gly12Val) TP53:c.524G>A<br>(p.Arg175His)                                                                                                                                                                                                                                    |                              |      |     |
| <u>116</u> | 51 | Male   | KRAS:c.35G>T<br>(p.Gly12Val) TP53:c.451C>T<br>(p.Pro151Ser) Microsatellite<br>Instability (MSI):MSS PD-L1<br>expression:negative TC<1%,<br>IC<1%                                                                                                                                               | negative <br>TC<1%,<br>IC<1% | 3,81 | MSS |
| <u>117</u> | -  | Female | KRAS:c.34G>C<br>(p.Gly12Arg) TP53:c.818G>T<br>(p.Arg273Leu) Microsatellite<br>Instability (MSI):MSS                                                                                                                                                                                            |                              | 5,79 | MSS |
| <u>118</u> | 53 | Female | KRAS:c.35G>A<br>(p.Gly12Asp) HNF1A:c.864del<br>G<br>(p.Pro291GlnfsTer51) TP53:c.<br>78delT<br>(p.Pro27LeufsTer17) Microsat<br>ellite Instability<br>(MSI):MSS PD-L1<br>expression:negative TC<1%,<br>IC<1% ERCC1:Low<br>expression TYMS:Low<br>expression UGT1A1:HETEROZ<br>YGOUS (6/7) DPD:WT | negative <br>TC<1%,<br>IC<1% | 6,1  | MSS |
| <u>119</u> | 68 | Female | KRAS:c.34G>C<br>(p.Gly12Arg) TP53:c.332T>A<br>(p.Leu111Gln)                                                                                                                                                                                                                                    |                              | 7,26 |     |

|            |    |        |                                                                                                                                                                 |                     |       |     |
|------------|----|--------|-----------------------------------------------------------------------------------------------------------------------------------------------------------------|---------------------|-------|-----|
| <u>120</u> | 58 | Male   | KRAS:c.35G>A<br>(p.Gly12Asp)  Microsatellite<br>Instability (MSI):MSS  PD-L1<br>expression:- TC 30%, IC<br>2%  Tumor Mutational Burden<br>(TMB):5,08 Muts/MB    | -  TC 30%,<br>IC 2% | 5,08  | MSS |
| <u>121</u> | -  | Male   | ALK:c.3452C>T<br>(p.Thr1151Met)  ATM:c.7916d<br>elA<br>(p.Lys2639ArgfsTer7)  FGFR4:c<br>.749_768delinsGGA<br>(p.Ile250Argfs*57)                                 |                     |       |     |
| <u>122</u> | 78 | Female | KRAS:c.35G>A<br>(p.Gly12Asp)  Tumor<br>Mutational Burden<br>(TMB):14,58 Muts/MB                                                                                 |                     | 14,58 |     |
| <u>123</u> | 32 | Male   | KRAS:c.35G>T<br>(p.Gly12Val)  NF2:c.1321delG<br>(p.Ala441LeufsTer14)  Micros<br>atellite Instability<br>(MSI):MSS  Tumor Mutational<br>Burden (TMB):2,9 Muts/MB |                     | 2,9   | MSS |
| <u>124</u> | 62 | Male   | KRAS:c.35G>A<br>(p.Gly12Asp)  MUTYH:c.536A><br>G<br>(p.Tyr179Cys)  Microsatellite<br>Instability (MSI):MSS  Tumor<br>Mutational Burden<br>(TMB):2.03 Muts/MB    |                     | 2,03  | MSS |
| <u>125</u> | 53 | Male   | KRAS:c.34G>C<br>(p.Gly12Arg)  TP53:c.614A>G<br>(p.Tyr205Cys)  Microsatellite<br>Instability (MSI):MSS  Tumor<br>Mutational Burden<br>(TMB):3.86 Muts/MB         |                     | 3,86  | MSS |

|            |    |        |                                                                                                                                                                                                                                                              |                        |       |     |
|------------|----|--------|--------------------------------------------------------------------------------------------------------------------------------------------------------------------------------------------------------------------------------------------------------------|------------------------|-------|-----|
| <u>126</u> | 66 | Male   | KRAS:c.35G>T (p.Gly12Val) TP53:c.742C>T (p.Arg248Trp) Microsatellite Instability (MSI):MSS PD-L1 expression:negative TC<1%, IC<1% Tumor Mutational Burden (TMB):13.03 Muts/MB                                                                                | negative  TC<1%, IC<1% | 13,03 | MSS |
| <u>127</u> | 77 | Male   | ATM:c.3673C>T (p.Gln1225Ter) BRCA2:c.8174 G>A (p.Trp2725Ter) CDKN2A:c.13 0delT (p.Tyr44ThrfsTer9) PALB2:c.2 761C>T (p.Gln921Ter) POLE:c.3038G> A (p.Trp1013Ter) STK11:c.1111 C>T (p.Gln371Ter) STK11:c.1111C >T (p.Gln371Ter) RAD50:c.2821C >T (p.Gln941Ter) |                        |       |     |
| <u>128</u> | 65 | Male   | KRAS:c.183A>C (p.Gln61His)                                                                                                                                                                                                                                   |                        |       |     |
| <u>129</u> | 70 | Female | KRAS:c.35G>T (p.Gly12Val) TP53:c.646G>A (p.Val216Met) MAP2K7:c.745 delA (p.Ile249SerfsTer162) AR:am plification CCNE1:amplificatio n Microsatellite Instability (MSI):MSS PD-L1 expression:negative TC<1%, IC<1% Tumor Mutational Burden (TMB):5.82 Muts/MB  | negative  TC<1%, IC<1% | 5,82  | MSS |
| <u>130</u> | 37 | Female | KRAS:c.35G>A (p.Gly12Asp)                                                                                                                                                                                                                                    |                        |       |     |

|            |    |        |                                                                                                                                                                                                                                                                                           |                                |      |     |
|------------|----|--------|-------------------------------------------------------------------------------------------------------------------------------------------------------------------------------------------------------------------------------------------------------------------------------------------|--------------------------------|------|-----|
| <u>131</u> | 66 | Male   | PALB2:c.2747_2748+4delAGG TAA Microsatellite Instability (MSI):MSS PD-L1 expression:negative TC <1%, IC<1%  Tumor Mutational Burden (TMB):3.84 Muts/MB                                                                                                                                    | negative  TC <1%, IC<1%        | 3,84 | MSS |
| <u>132</u> | 70 | Male   | SF3B1:c.1998G>C (p.Lys666Asn) DSC3:c.2503C>T (p.Arg835Ter) Microsatellite Instability (MSI):MSS PD-L1 expression: TC<1%, IC<1% Tumor Mutational Burden (TMB):9.4 Muts/MB                                                                                                                  | unknown negative  TC<1%, IC<1% | 9,4  | MSS |
| <u>133</u> | 72 | Female | KRAS:c.35G>A (p.Gly12Asp) CDKN2A:c.381_435delACGGTACCTGCGCGCG GCTGCGGGGGGACCAGAGGC AGTAACCATGCCGCATA (p.Arg128MetfsTer9) Microsa tellite Instability (MSI):MSS PD-L1 expression:negative TC<1%, IC<1% Tumor Mutational Burden (TMB):9.59 Muts/MB ERCC1:Low expression TYMS:Low expression | negative  TC<1%, IC<1%         | 9,59 | MSS |
| <u>134</u> | 83 | Male   | MET:amplification                                                                                                                                                                                                                                                                         |                                |      |     |
| <u>135</u> | 65 | Male   | KRAS:c.35G>A (p.Gly12Asp) GNAS:c.601C>T (p.Arg201Cys) PD-L1 expression: TC<1%, IC=2 Tumor Mutational Burden (TMB):6.9 Muts/MB                                                                                                                                                             | unknown positive  TC<1%, IC=2  | 6,9  |     |

|            |    |        |                                                                                                                                                                                                                         |                         |      |     |
|------------|----|--------|-------------------------------------------------------------------------------------------------------------------------------------------------------------------------------------------------------------------------|-------------------------|------|-----|
| <u>136</u> | 52 | Male   | Microsatellite Instability (MSI):MSS PD-L1 expression:negative TC<1% IC<1% Tumor Mutational Burden (TMB):9.52 Muts/MB                                                                                                   | negative  TC<1% IC<1%   | 9,52 | MSS |
| <u>137</u> | 79 | Female | KRAS:c.772G>A (p.Glu258Lys) TP53:c.35G>A (p.Gly12Asp) Microsatellite Instability (MSI):MSS PD-L1 expression:positive TC>50%, IC<1% Tumor Mutational Burden (TMB):4,78 Muts/MB ERCC1:Low expression TYMS:Low expression  | positive  TC>50%, IC<1% | 4,78 | MSS |
| <u>138</u> | 77 | Male   | Microsatellite Instability (MSI):MSS PD-L1 expression:negative TC<1%, IC<1% Tumor Mutational Burden (TMB):3,87 Muts/MB ERCC1:Low expression TYMS:Low expression                                                         | negative  TC<1%, IC<1%  | 3,87 | MSS |
| <u>139</u> | 57 | Female | KRAS:c.35G>A (p.Gly12Asp) TP53:c.702C>G (p.Tyr234Ter) Microsatellite Instability (MSI):MSS PD-L1 expression:positive TC>50%, IC<1% Tumor Mutational Burden (TMB):4,92 Muts/MB ERCC1:High expression TYMS:Low expression | positive  TC>50%, IC<1% | 4,92 | MSS |
| <u>140</u> | 51 | Male   | KRAS:c.35G>A (p.Gly12Asp) TP53:c.856G>A (p.Glu286Lys)                                                                                                                                                                   |                         |      |     |

|            |    |        |                                                                                                                                                                                                                             |                       |       |     |
|------------|----|--------|-----------------------------------------------------------------------------------------------------------------------------------------------------------------------------------------------------------------------------|-----------------------|-------|-----|
| <u>141</u> | 81 | Female | KRAS:c.35G>T (p.Gly12Val)  Microsatellite Instability (MSI):MSS  PD-L1 expression:negative TC<1% IC<1%  Tumor Mutational Burden (TMB):3,82 Muts/MB                                                                          | negative  TC<1% IC<1% | 3,82  | MSS |
| <u>142</u> | 50 | Male   | Microsatellite Instability (MSI):MSS  PD-L1 expression:negative TC<1% IC<1%  Tumor Mutational Burden (TMB):3,81 Muts/MB  ERCC1:High expression  TYMS:Low expression                                                         | negative  TC<1% IC<1% | 3,81  | MSS |
| <u>143</u> | 63 | Female | KRAS:c.35G>A (p.Gly12Asp)  MDM2:amplification  Tumor Mutational Burden (TMB):5,94 Muts/MB                                                                                                                                   |                       | 5,94  |     |
| <u>144</u> | 51 | Female | KRAS:c.35G>A (p.Gly12Asp)  TP53:c.586C>T (p.Arg196Ter)  Microsatellite Instability (MSI):MSS  PD-L1 expression:negative TC<1% IC<1%  Tumor Mutational Burden (TMB):21,85 Muts/MB  ERCC1:Low expression  TYMS:Low expression | negative  TC<1% IC<1% | 21,85 | MSS |
| <u>145</u> | 58 | Male   | KRAS:c.35G>T (p.Gly12Val)  CDKN2A:c.138delIG (p.Arg47GlyfsTer6)  TP53:c.827C>A (p.Ala276Asp)                                                                                                                                |                       |       |     |

|            |    |        |                                                                                                                                                                                                                                                        |                         |      |     |
|------------|----|--------|--------------------------------------------------------------------------------------------------------------------------------------------------------------------------------------------------------------------------------------------------------|-------------------------|------|-----|
| <u>146</u> | 63 | Female | KRAS:c.34G>C (p.Gly12Arg)  Microsatellite Instability (MSI):MSS  PD-L1 expression:negative TC<1% IC<1%  Tumor Mutational Burden (TMB):2,92 Muts/MB  ERCC1:High expression  TYMS:Low expression                                                         | negative  TC<1% IC<1%   | 2,92 | MSS |
| <u>147</u> | 71 | Female | KRAS:c.35G>T (p.Gly12Val)  TP53:c.796G>T (p.Gly266Ter)  ATR:c.5605C>T (p.Gln1869Ter)  Microsatellite Instability (MSI):MSS  PD-L1 expression:positive TC 30%, IC<1%  Tumor Mutational Burden (TMB): Muts/MB  ERCC1:Low expression  TYMS:Low expression | positive  TC 30%, IC<1% |      | MSS |
| <u>148</u> | 64 | Male   | KRAS:c.35G>A (p.Gly12Asp)  Microsatellite Instability (MSI):MSS  PD-L1 expression:negative TC<1% IC<1%  Tumor Mutational Burden (TMB):6,77 Muts/MB                                                                                                     | negative  TC<1% IC<1%   | 6,77 | MSS |
| <u>149</u> | 66 | Male   | KRAS:c.35G>T (p.Gly12Val)  TP53:c.743G>A (p.Arg248Gln)  Microsatellite Instability (MSI):MSS  PD-L1 expression:positive TC 2%, IC<1%  Tumor Mutational Burden (TMB):5,76 Muts/MB                                                                       | positive  TC 2%, IC<1%  | 5,76 | MSS |

|            |    |        |                                                                                                                                                                                                                |                         |       |     |
|------------|----|--------|----------------------------------------------------------------------------------------------------------------------------------------------------------------------------------------------------------------|-------------------------|-------|-----|
| <u>150</u> | 49 | Female | KRAS:c.34G>C (p.Gly12Arg)  Microsatellite Instability (MSI):MSS  PD-L1 expression:positive TC 30% IC 1%  Tumor Mutational Burden (TMB):12,39 Muts/MB                                                           | positive  TC 30% IC 1%  | 12,39 | MSS |
| <u>151</u> | 62 | Female | KRAS:c.35G>A (p.Gly12Asp)  TP53:c.919+2T>G (splicing)  Microsatellite Instability (MSI):MSS  PD-L1 expression:positive TC 30%, IC<1%  Tumor Mutational Burden (TMB):1,91 Muts/MB                               | positive  TC 30%, IC<1% | 1,91  | MSS |
| <u>152</u> | 70 | Female | KRAS:c.182A>G (p.Gln61Arg)                                                                                                                                                                                     |                         | 7,01  |     |
| <u>153</u> | 72 | Female | KRAS:c.35G>T (p.Gly12Val)  Microsatellite Instability (MSI):MSS  PD-L1 expression:negative TC<1% IC<1%  Tumor Mutational Burden (TMB):14,29 Muts/MB  ERCC1:Low expression  TYMS:Low expression                 | negative  TC<1% IC<1%   | 14,29 | MSS |
| <u>154</u> | 50 | Male   | KRAS:c.35G>A (p.Gly12Asp)  CDKN2A:c.238C>T (p.Arg80Ter)  TP53:c.742C>T (p.Arg248Trp)  Microsatellite Instability (MSI):MSS  PD-L1 expression:positive TC<1%, IC 5%  Tumor Mutational Burden (TMB):4,78 Muts/MB | positive  TC<1%, IC 5%  | 4,78  | MSS |

|            |    |        |                                                                                                                                                                                                                                                                                        |                              |      |     |
|------------|----|--------|----------------------------------------------------------------------------------------------------------------------------------------------------------------------------------------------------------------------------------------------------------------------------------------|------------------------------|------|-----|
| <u>155</u> | 57 | Male   | KRAS:c.34G>C<br>(p.Gly12Arg) TP53:c.742C>T<br>(p.Arg248Trp) Microsatellite<br>Instability (MSI):MSS PD-L1<br>expression:positive TC<1<br>IC2% Tumor Mutational<br>Burden (TMB):0,95 Muts/MB                                                                                            | positive T<br>C<1 IC2%       | 0,95 | MSS |
| <u>156</u> | 74 | Male   | KRAS:c.183A>C<br>(p.Gln61His) NOTCH1:c.2047<br>G>A<br>(p.Ala683Thr) Microsatellite<br>Instability (MSI):MSS PD-L1<br>expression:negative TC<1%<br>IC<1% Tumor Mutational<br>Burden (TMB):3,89 Muts/MB                                                                                  | negative <br>TC<1%<br>IC<1%  | 3,89 | MSS |
| <u>157</u> | 55 | Male   | KRAS:c.35G>T<br>(p.Gly12Val) TP53:c.421T>C<br>(p.Cys141Arg) CDKN2A:c.262<br>G>T<br>(p.Glu88Ter) SMAD4:c.719_7<br>20insT<br>(p.Ala241SerfsTer23) Microsa<br>tellite Instability<br>(MSI):MSS PD-L1<br>expression:negative TC<1%,<br>IC<1% Tumor Mutational<br>Burden (TMB):7,71 Muts/MB | negative <br>TC<1%,<br>IC<1% | 7,71 | MSS |
| <u>158</u> | 57 | Female | KRAS:c.35G>T<br>(p.Gly12Val) TP53:c.524G>A<br>(p.Arg175His) KRAS:amplifica<br>tion Microsatellite Instability<br>(MSI):MSS PD-L1<br>expression:negative TC<1%,<br>IC<1% Tumor Mutational<br>Burden (TMB):1,89 Muts/MB                                                                  | negative <br>TC<1%,<br>IC<1% | 1,89 | MSS |

|            |    |        |                                                                                                                                                                                                                                         |                                |      |     |
|------------|----|--------|-----------------------------------------------------------------------------------------------------------------------------------------------------------------------------------------------------------------------------------------|--------------------------------|------|-----|
| <u>159</u> | 74 | Female | KRAS:c.34G>C<br>(p.Gly12Arg)  RSPO2<br>fusion:EIF3E(1) -<br>RSPO2(2)  Microsatellite<br>Instability (MSI):MSS  PD-L1<br>expression:negative TC<1%<br>IC<1%  Tumor Mutational<br>Burden (TMB):5,87 Muts/MB                               | negative <br>TC<1%<br>IC<1%    | 5,87 | MSS |
| <u>160</u> | 61 | Male   | KRAS:c.35G>A<br>(p.Gly12Asp)  TP53:c.402T>G<br>(p.Phe134Leu)  Microsatellite<br>Instability (MSI):MSS  PD-L1<br>expression:positive TC<1%, IC<br>30%  Tumor Mutational<br>Burden (TMB):4,8 Muts/MB                                      | positive  T<br>C<1%, IC<br>30% | 4,8  | MSS |
| <u>161</u> | 63 | Male   | KRAS:c.35G>T<br>(p.Gly12Val)  TP53:c.599+2T><br>G ()  Microsatellite Instability<br>(MSI):MSS  PD-L1<br>expression:positive TC 2%,<br>IC<1%  Tumor Mutational<br>Burden (TMB):3,84 Muts/MB                                              | positive  T<br>C 2%,<br>IC<1%  | 3,84 | MSS |
| <u>162</u> | 41 | Male   | KRAS:c.34G>C<br>(p.Gly12Arg)  TP53:c.856G>A<br>(p.Glu286Lys)  SMAD4:c.1333<br>C>T<br>(p.Arg445Ter)  Microsatellite<br>Instability (MSI):MSS  PD-L1<br>expression:negative TC<1%<br>IC<1%  Tumor Mutational<br>Burden (TMB):6,76 Muts/MB | negative <br>TC<1%<br>IC<1%    | 6,76 | MSS |
| <u>163</u> | 78 | Male   | ATM:c.5980A>T<br>(p.Lys1994Ter)  KRAS:c.34G>C<br>(p.Gly12Arg)                                                                                                                                                                           |                                |      |     |

|            |    |        |                                                                                                                                                                                                                                                    |                                 |      |     |
|------------|----|--------|----------------------------------------------------------------------------------------------------------------------------------------------------------------------------------------------------------------------------------------------------|---------------------------------|------|-----|
| <u>164</u> | 67 | Female | KRAS:c.35G>T<br>(p.Gly12Val) RNF43:c.1418del<br>G<br>(p.Gly473AlafsTer29) TP53:c.<br>586C>T<br>(p.Arg196Ter)  Microsatellite<br>Instability (MSI):MSS  PD-L1<br>expression:positive TC<1%, IC<br>10% Tumor Mutational<br>Burden (TMB):5,78 Muts/MB | positive  T<br>C<1%, IC<br>10%  | 5,78 | MSS |
| <u>165</u> | 62 | Male   | KRAS:c.35G>A<br>(p.Gly12Asp)  Microsatellite<br>Instability (MSI):MSS  PD-L1<br>expression:positive TC 10%,<br>IC<1% Tumor Mutational<br>Burden (TMB):7,73<br>Muts/MB  ERCC1:Low<br>expression  TYMS:Low<br>expression                             | positive  T<br>C 10%,<br>IC<1%  | 7,73 | MSS |
| <u>166</u> | 69 | Male   | KRAS:c.34G>C<br>(p.Gly12Arg) TP53:c.817C>T<br>(p.Arg273Cys)  Microsatellite<br>Instability (MSI):MSS  PD-L1<br>expression:positive TC 20%, IC<br>10% Tumor Mutational<br>Burden (TMB):4,88 Muts/MB                                                 | positive  T<br>C 20%, IC<br>10% | 4,88 | MSS |
| <u>167</u> | 60 | Male   | KRAS:c.35G>A<br>(p.Gly12Asp)  Microsatellite<br>Instability (MSI):MSS  PD-L1<br>expression:positive TC 5% IC<br>15% Tumor Mutational<br>Burden (TMB):0,96 Muts/MB                                                                                  | positive  T<br>C 5% IC<br>15%   | 0,96 | MSS |

|            |    |        |                                                                                                                                                                                                                                                                                        |                        |      |     |
|------------|----|--------|----------------------------------------------------------------------------------------------------------------------------------------------------------------------------------------------------------------------------------------------------------------------------------------|------------------------|------|-----|
| <u>168</u> | 73 | Male   | KRAS:c.183A>T (p.Gln61His) Microsatellite Instability (MSI):MSS PD-L1 expression:negative TC<1%, IC<1% Tumor Mutational Burden (TMB):4,83 Muts/MB ERCC1:Low expression TYMS:Low expression UGT1A1:WT (6/6) DPD:WT                                                                      | negative  TC<1%, IC<1% | 4,83 | MSS |
| <u>169</u> | 82 | Female | BRCA1:c.5251C>T (p.Arg1751Ter) KRAS:c.35G>A (p.Gly12Asp) TP53:c.687T>A (p.Cys229Ter) RASA2:c.2023delC (p.Gln675LysfsTer2) AR:amplification SLCO1B3:amplification Microsatellite Instability (MSI):MSS PD-L1 expression:positive TC 10% IC<1% Tumor Mutational Burden (TMB):6,7 Muts/MB | positive  TC 10% IC<1% | 6,7  | MSS |
| <u>170</u> | 58 | Male   | KRAS:c.35G>A (p.Gly12Asp) STK11:c.180C>G (p.Tyr60Ter) STK11:c.180C>G (p.Tyr60Ter) Microsatellite Instability (MSI):MSS PD-L1 expression:negative TC<1%, IC<1% Tumor Mutational Burden (TMB):4,29 Muts/MB                                                                               | negative  TC<1%, IC<1% | 4,29 | MSS |

|            |    |      |                                                                                                                                                                                                                                                                                                                |                              |      |     |
|------------|----|------|----------------------------------------------------------------------------------------------------------------------------------------------------------------------------------------------------------------------------------------------------------------------------------------------------------------|------------------------------|------|-----|
| <u>171</u> | 80 | Male | KRAS:c.34G>C<br>(p.Gly12Arg) TP53:c.841G>A<br>(p.Asp281Asn) Microsatellite<br>Instability (MSI):MSS PD-L1<br>expression:negative TC<1%,<br>IC<1% Tumor Mutational<br>Burden (TMB):1,93<br>Muts/MB ERCC1:Low<br>expression TYMS:Low<br>expression UGT1A1:HETEROZ<br>YGOUS (6/7) DPD:WT                          | negative <br>TC<1%,<br>IC<1% | 1,93 | MSS |
| <u>172</u> | 71 | Male | CDKN2A:c.186_187insG<br>(p.Leu63AlafsTer57) ATM:c.9<br>023G>A<br>(p.Arg3008His) KRAS:c.35G>A<br>(p.Gly12Asp) RNF43:c.714G><br>A<br>(p.Trp238Ter) CDK2:amplifica<br>tion                                                                                                                                        |                              |      |     |
| <u>173</u> | 64 | Male | KRAS:c.35G>A<br>(p.Gly12Asp) TP53:c.524G>A<br>(p.Arg175His) CDKN2A:c.172<br>C>T<br>(p.Arg58Ter) Microsatellite<br>Instability (MSI):MSS PD-L1<br>expression:negative TC<1%,<br>IC<1% Tumor Mutational<br>Burden (TMB):4,84<br>Muts/MB ERCC1:Low<br>expression TYMS:Low<br>expression UGT1A1:WT<br>(6/6) DPD:WT | negative <br>TC<1%,<br>IC<1% | 4,84 | MSS |

|            |    |        |                                                                                                                                                                                                                             |                        |      |     |
|------------|----|--------|-----------------------------------------------------------------------------------------------------------------------------------------------------------------------------------------------------------------------------|------------------------|------|-----|
| <u>174</u> | 51 | Male   | KRAS:c.35G>A (p.Gly12Asp)  Microsatellite Instability (MSI):MSS  PD-L1 expression:negative TC<1%, IC<1%  Tumor Mutational Burden (TMB):0,96 Muts/MB                                                                         | negative  TC<1%, IC<1% | 0,96 | MSS |
| <u>175</u> | 58 | Female | KRAS:c.35G>A (p.Gly12Asp)  TP53:c.818G>A (p.Arg273His)  Microsatellite Instability (MSI):MSS  Tumor Mutational Burden (TMB):12,7 Muts/MB                                                                                    |                        | 12,7 | MSS |
| <u>176</u> | 65 | Male   | KRAS:c.35G>A (p.Gly12Asp)  SMAD4:c.353C>T (p.Ala118Val)  RSPO2 fusion:EIF3E(1) - RSPO2(2)  Microsatellite Instability (MSI):MSS  PD-L1 expression:negative TC<1%, IC<1%  Tumor Mutational Burden (TMB):6,87 Muts/MB         | negative  TC<1%, IC<1% | 6,87 | MSS |
| <u>177</u> | 57 | Male   | KRAS:c.35G>T (p.Gly12Val)  TP53:c.743G>A (p.Arg248Gln)  Microsatellite Instability (MSI):MSS  PD-L1 expression:negative TC<1%, IC<1%  Tumor Mutational Burden (TMB):4,79 Muts/MB  ERCC1:Low expression  TYMS:Low expression | negative  TC<1%, IC<1% | 4,79 | MSS |
| <u>178</u> | 54 | Female | KRAS:c.35G>T (p.Gly12Val)  TP53:c.916C>T (p.Arg306Ter)  CDKN2A:c.233_234insT (p.Thr79fs)                                                                                                                                    |                        |      |     |

|            |    |        |                                                                                                                                                                                                                        |                        |       |     |
|------------|----|--------|------------------------------------------------------------------------------------------------------------------------------------------------------------------------------------------------------------------------|------------------------|-------|-----|
| <u>179</u> | 63 | Female | KRAS:c.35G>A (p.Gly12Asp) TP53:c.524G>A (p.Arg175His) Microsatellite Instability (MSI):MSS PD-L1 expression:negative TC<1%, IC<1% Tumor Mutational Burden (TMB):32,89 Muts/MB ERCC1:Low expression TYMS:Low expression | negative  TC<1%, IC<1% | 32,89 | MSS |
| <u>180</u> | 66 | Female | KRAS:c.34G>C (p.Gly12Arg) SMAD4:c.175del A (p.Thr59GlnfsTer3) Microsatellite Instability (MSI):MSS PD-L1 expression:negative TC<1% IC<1% Tumor Mutational Burden (TMB):2,86 Muts/MB                                    | negative  TC<1% IC<1%  | 2,86  | MSS |
| <u>181</u> | 71 | Male   | KRAS:c.34G>C (p.Gly12Arg) Microsatellite Instability (MSI):MSS PD-L1 expression:negative TC<1% IC<1% Tumor Mutational Burden (TMB):5,72 Muts/MB                                                                        | negative  TC<1% IC<1%  | 5,72  | MSS |
| <u>182</u> | 64 | Female | KRAS:c.34G>C (p.Gly12Arg) TP53:c.701A>G (p.Tyr234Cys)                                                                                                                                                                  |                        |       |     |
| <u>183</u> | 59 | Female | KRAS:c.35G>A (p.Gly12Asp) TP53:c.637C>T (p.Arg213Ter) AR:amplification Microsatellite Instability (MSI):MSS PD-L1 expression:negative TC<1% IC<1% Tumor Mutational Burden (TMB):3,81 Muts/MB                           | negative  TC<1% IC<1%  | 3,81  | MSS |

|            |    |        |                                                                                                                                                                                                                                                          |                                |       |     |
|------------|----|--------|----------------------------------------------------------------------------------------------------------------------------------------------------------------------------------------------------------------------------------------------------------|--------------------------------|-------|-----|
| <u>184</u> | 62 | Female | KRAS:c.35G>A<br>(p.Gly12Asp)  Microsatellite<br>Instability (MSI):MSS  PD-L1<br>expression:positive TC<1%, IC<br>2%  Tumor Mutational Burden<br>(TMB):10,29 Muts/MB                                                                                      | positive  T<br>C<1%, IC<br>2%  | 10,29 | MSS |
| <u>185</u> | 60 | Male   | KRAS:c.35G>A<br>(p.Gly12Asp)  CDKN2A:c.47_5<br>0delTGGC<br>(p.Leu16ProfsTer9)  TP53:c.83<br>3C>T<br>(p.Pro278Leu)  Microsatellite<br>Instability (MSI):MSS  PD-L1<br>expression:positive TC<1%, IC<br>15%  Tumor Mutational<br>Burden (TMB):7,81 Muts/MB | positive  T<br>C<1%, IC<br>15% | 7,81  | MSS |
| <u>186</u> | 43 | Female |                                                                                                                                                                                                                                                          |                                |       |     |
| <u>187</u> | 51 | Male   | Microsatellite Instability<br>(MSI):-  PD-L1<br>expression:negative TC<1%<br>IC<1%  Tumor Mutational<br>Burden (TMB): Muts/MB                                                                                                                            | negative <br>TC<1%<br>IC<1%    |       | -   |

|            |    |        |                                                                                                                                                                                                                                                                                                                |                             |      |     |
|------------|----|--------|----------------------------------------------------------------------------------------------------------------------------------------------------------------------------------------------------------------------------------------------------------------------------------------------------------------|-----------------------------|------|-----|
| <u>188</u> | 66 | Female | KRAS:c.35G>T<br>(p.Gly12Val) TP53:c.659A>G<br>(p.Tyr220Cys) GNAS:c.602G>A<br>(p.Arg201His) STED2:c.2324_2325delTT<br>(p.Val775Glu>Ter5) Microsatellite Instability<br>(MSI):MSS PD-L1 expression:negative TC<1%<br>IC<1% Tumor Mutational Burden (TMB):2,9<br>Muts/MB ERCC1:Low expression TYMS:Low expression | negative <br>TC<1%<br>IC<1% | 2,9  | MSS |
| <u>189</u> | 36 | Female | Microsatellite Instability (MSI):MSS PD-L1 expression:negative  Tumor Mutational Burden (TMB):0,96 Muts/MB                                                                                                                                                                                                     | negative                    | 0,96 | MSS |
| <u>190</u> | 58 | Female | KRAS:c.34G>C<br>(p.Gly12Arg) Microsatellite Instability (MSI):MSS PD-L1 expression:negative TC<1%<br>IC<1% Tumor Mutational Burden (TMB):1,92<br>Muts/MB ERCC1:Low expression TYMS:Low expression UGT1A1:HETEROZYGOUS (6/7) DPD:WT                                                                             | negative <br>TC<1%<br>IC<1% | 1,92 | MSS |

|            |    |        |                                                                                                                                                                                                                                                                                                                                                                              |                       |      |     |
|------------|----|--------|------------------------------------------------------------------------------------------------------------------------------------------------------------------------------------------------------------------------------------------------------------------------------------------------------------------------------------------------------------------------------|-----------------------|------|-----|
| <u>191</u> | 55 | Male   | BRCA2:c.3374_3375delTT<br>(p.Phe1125Ter) CDKN2A:c.131_132insA<br>(p.Tyr44Ter) KRAS:c.35G>A<br>(p.Gly12Asp) PIK3CA:c.1358A>G<br>(p.Glu453Gly) TP53:c.817C>T<br>(p.Arg273Cys) FBXW7:c.1393C>T<br>(p.Arg465Cys) Microsatellite Instability (MSI):MSS PD-L1 expression:negative TC<1%, IC<1% Tumor Mutational Burden (TMB):7,33 Muts/MB ERCC1:Low expression TYMS:Low expression | negative TC<1%, IC<1% | 7,33 | MSS |
| <u>192</u> | 60 | Female | KRAS:c.35G>T<br>(p.Gly12Val) TP53:c.646G>A<br>(p.Val216Met) Microsatellite Instability (MSI):MSS PD-L1 expression:negative TC<1% IC<1% Tumor Mutational Burden (TMB):4,12 Muts/MB ERCC1:High expression TYMS:Low expression                                                                                                                                                  | negative TC<1% IC<1%  | 4,12 | MSS |
| <u>193</u> | 79 | Female | KRAS:c.34G>A<br>(p.Gly12Ser) Microsatellite Instability (MSI):MSS PD-L1 expression:negative TC<1%, IC<1% Tumor Mutational Burden (TMB):4,82 Muts/MB ERCC1:Low expression TYMS:Low expression                                                                                                                                                                                 | negative TC<1%, IC<1% | 4,82 | MSS |

|            |    |        |                                                                                                                                                                                                                                                                                                                                                                                                                 |                              |      |     |
|------------|----|--------|-----------------------------------------------------------------------------------------------------------------------------------------------------------------------------------------------------------------------------------------------------------------------------------------------------------------------------------------------------------------------------------------------------------------|------------------------------|------|-----|
| <u>194</u> | 68 | Female | KRAS:c.35G>A<br>(p.Gly12Asp) TP53:c.524G>A<br>(p.Arg175His) Microsatellite<br>Instability (MSI):MSS PD-L1<br>expression:negative TC<1%,<br>IC<1% Tumor Mutational<br>Burden (TMB):1,98 Muts/MB                                                                                                                                                                                                                  | negative <br>TC<1%,<br>IC<1% | 1,98 | MSS |
| <u>195</u> | 65 | Male   | TP53:c.997delC<br>(p.Arg333ValfsTer12)                                                                                                                                                                                                                                                                                                                                                                          |                              |      |     |
| <u>196</u> | 49 | Female | ATM:c.8545C>T<br>(p.Arg2849Ter) ATM:c.1564G<br>>T<br>(p.Glu522Ter) KRAS:c.35G>A<br>(p.Gly12Asp) SMAD4:c.403C><br>T<br>(p.Arg135Ter) RNF43:c.1436_<br>1437delTG<br>(p.Val479GlyfsTer25) PIK3CA:<br>c.263G>A<br>(p.Arg88Gln) Microsatellite<br>Instability (MSI):MSS PD-L1<br>expression:positive TC 50%,IC<br>5% Tumor Mutational Burden<br>(TMB):9,55<br>Muts/MB ERCC1:Low<br>expression TYMS:Low<br>expression | positive T<br>C 50%,IC<br>5% | 9,55 | MSS |
| <u>197</u> | 73 | Female | KRAS:c.35G>A<br>(p.Gly12Asp) TP53:c.743G>A<br>(p.Arg248Gln) Microsatellite<br>Instability (MSI):MSS PD-L1<br>expression:negative TC<1%<br>IC<1% Tumor Mutational<br>Burden (TMB):4,82<br>Muts/MB ERCC1:Low<br>expression TYMS:Low<br>expression                                                                                                                                                                 | negative <br>TC<1%<br>IC<1%  | 4,82 | MSS |

|            |    |        |                                                                                                                                                                                                                                                       |                             |      |     |
|------------|----|--------|-------------------------------------------------------------------------------------------------------------------------------------------------------------------------------------------------------------------------------------------------------|-----------------------------|------|-----|
| <u>198</u> | 60 | Male   | KRAS:c.34G>C<br>(p.Gly12Arg) TP53:c.742C>T<br>(p.Arg248Trp) MYC:amplification Microsatellite Instability (MSI):MSS PD-L1 expression:negative TC<1%<br>IC<1% Tumor Mutational Burden (TMB):2,98 Muts/MB                                                | negative <br>TC<1%<br>IC<1% | 2,98 | MSS |
| <u>199</u> | 60 | Female | KRAS:c.34G>C<br>(p.Gly12Arg) SMAD4:c.362T>A<br>(p.Leu121Ter) TP53:c.817C>T<br>(p.Arg273Cys) FGF23:amplification CCND2:amplification Microsatellite Instability (MSI):MSS Tumor Mutational Burden (TMB):8,61 Muts/MB                                   |                             | 8,61 | MSS |
| <u>200</u> | 82 | Female | KRAS:c.35G>T<br>(p.Gly12Val) TP53:c.710T>A<br>(p.Met237Lys) Microsatellite Instability (MSI):MSS PD-L1 expression:negative TC<1%<br>IC<1% Tumor Mutational Burden (TMB):3,99 Muts/MB ERCC1:High expression TYMS:Low expression UGT1A1:WT (6/6) DPD:WT | negative <br>TC<1%<br>IC<1% | 3,99 | MSS |

|            |    |        |                                                                                                                                                                                                                                                          |                       |      |     |
|------------|----|--------|----------------------------------------------------------------------------------------------------------------------------------------------------------------------------------------------------------------------------------------------------------|-----------------------|------|-----|
| <u>201</u> | 43 | Female | TP53:c.679_690delTCTGACTG TACC (p.Ser227_Thr230del) MET:amplification MRE11:amplification Microsatellite Instability (MSI):MSS PD-L1 expression:negative TC<1% IC<1% Tumor Mutational Burden (TMB):9,8 Muts/MB ERCC1:High expression TYMS:Low expression | negative  TC<1% IC<1% | 9,8  | MSS |
| <u>202</u> | 77 | Male   | Microsatellite Instability (MSI):MSS PD-L1 expression:negative TC<1% IC<1% Tumor Mutational Burden (TMB):1,96 Muts/MB ERCC1:Low expression TYMS:Low expression                                                                                           | negative  TC<1% IC<1% | 1,96 | MSS |
| <u>203</u> | 81 | Male   | KRAS:c.35G>T (p.Gly12Val) Microsatellite Instability (MSI):MSS PD-L1 expression:negative TC<1% IC<1% Tumor Mutational Burden (TMB):3,97 Muts/MB ERCC1:Low expression TYMS:Low expression                                                                 | negative  TC<1% IC<1% | 3,97 | MSS |
| <u>204</u> | 76 | Male   | ERBB2:c.2524G>A (p.Val842Ile) SMAD4:c.1082G>A (p.Arg361His) TP53:c.824G>A (p.Cys275Tyr) KRAS:amplification Microsatellite Instability (MSI):MSS PD-L1 expression:negative TC<1% IC<1% Tumor Mutational Burden (TMB):6,76 Muts/MB                         | negative  TC<1% IC<1% | 6,76 | MSS |

|            |    |        |                                                                                                                                                                                                                                                                            |                        |      |     |
|------------|----|--------|----------------------------------------------------------------------------------------------------------------------------------------------------------------------------------------------------------------------------------------------------------------------------|------------------------|------|-----|
| <u>205</u> | 51 | Male   | BRCA2:c.67+1G>A KRAS:c.35 G>T (p.Gly12Val) TP53:c.817C>T (p.Arg273Cys) Microsatellite Instability (MSI):MSS PD-L1 expression:negative TC<1% IC<1% Tumor Mutational Burden (TMB): Muts/MB ERCC1:High expression TYMS:Low expression UGT1A1:HOMOZY GOYS MUTATED (7/7) DPD:WT | negative  TC<1% IC<1%  |      | MSS |
| <u>206</u> | 63 | Male   | KRAS:c.35G>A (p.Gly12Asp) Microsatellite Instability (MSI):MSS PD-L1 expression:negative TC<1% IC<1% Tumor Mutational Burden (TMB):4,78 Muts/MB                                                                                                                            | negative  TC<1% IC<1%  | 4,78 | MSS |
| <u>207</u> | 49 | Female | Microsatellite Instability (MSI):MSS PD-L1 expression:negative TC<1%, IC<1% Tumor Mutational Burden (TMB):2,87 Muts/MB ERCC1:High expression TYMS:Low expression UGT1A1:WT (6/6) DPD:WT                                                                                    | negative  TC<1%, IC<1% | 2,87 | MSS |

|            |    |        |                                                                                                                                                                                                                                                                                      |                              |      |     |
|------------|----|--------|--------------------------------------------------------------------------------------------------------------------------------------------------------------------------------------------------------------------------------------------------------------------------------------|------------------------------|------|-----|
| <u>208</u> | 39 | Female | KRAS:c.35G>T<br>(p.Gly12Val) SMAD4:c.403C>T<br>(p.Arg135Ter) RB1:c.1351_1357delCGCTTGT<br>(p.Arg451IlefsTer4) TP53:c.985_993+4delACCTTCAGGTAC<br>(splicing) Microsatellite Instability (MSI):MSS PD-L1 expression:negative TC<1%<br>IC<1% Tumor Mutational Burden (TMB):3,89 Muts/MB | negative <br>TC<1%<br>IC<1%  | 3,89 | MSS |
| <u>209</u> | 42 | Female | KRAS:c.35G>A<br>(p.Gly12Asp) TP53:c.159G>A<br>(p.Trp53Ter)                                                                                                                                                                                                                           |                              |      |     |
| <u>210</u> | 70 | Male   | KRAS:c.35G>A<br>(p.Gly12Asp) Microsatellite Instability (MSI):MSS PD-L1 expression:negative TC<1%<br>IC<1% Tumor Mutational Burden (TMB):2,86 Muts/MB                                                                                                                                | negative <br>TC<1%<br>IC<1%  | 2,86 | MSS |
| <u>211</u> | 64 | Female | KRAS:c.35G>A<br>(p.Gly12Asp) TP53:c.403T>C<br>(p.Cys135Arg) Microsatellite Instability (MSI):MSS PD-L1 expression:negative TC<1%,<br>IC<1% Tumor Mutational Burden (TMB):2,85 Muts/MB ERCC1:Low expression TYMS:Low expression                                                       | negative <br>TC<1%,<br>IC<1% | 2,85 | MSS |

|            |    |        |                                                                                                                                                                                                                                                                                                                   |                      |      |     |
|------------|----|--------|-------------------------------------------------------------------------------------------------------------------------------------------------------------------------------------------------------------------------------------------------------------------------------------------------------------------|----------------------|------|-----|
| <u>212</u> | 66 | Male   | BAP1:c.125delC<br>(p.Pro42LeufsTer30) KRAS:c.183A>T<br>(p.Gln61His) ARID1A:c.2180_2189del<br>(p.Arg727LeufsTer12) ERCC2:c.1972C>T<br>(p.Arg658Cys) Microsatellite Instability (MSI):MSS PD-L1 expression:negative TC<1% IC<1% Tumor Mutational Burden (TMB):5,3 Muts/MB ERCC1:High expression TYMS:Low expression | negative TC<1% IC<1% | 5,3  | MSS |
| <u>213</u> | 59 | Female | KRAS:c.35G>A<br>(p.Gly12Asp) TP53:c.844C>T<br>(p.Arg282Trp) DPYD:c.1905+1G>A Microsatellite Instability (MSI):MSS PD-L1 expression:negative TC<1% IC<1% Tumor Mutational Burden (TMB):7,58 Muts/MB                                                                                                                | negative TC<1% IC<1% | 7,58 | MSS |
| <u>214</u> | 58 | Female | KRAS:c.35G>T<br>(p.Gly12Val) TP53:c.659A>G<br>(p.Tyr220Cys) EMSY:amplification Microsatellite Instability (MSI):MSS PD-L1 expression:positive TC<1% IC 2% Tumor Mutational Burden (TMB):7,6 Muts/MB ERCC1:High expression TYMS:Low expression                                                                     | positive TC<1% IC 2% | 7,6  | MSS |

|            |    |        |                                                                                                                                                                                                                                              |                       |      |     |
|------------|----|--------|----------------------------------------------------------------------------------------------------------------------------------------------------------------------------------------------------------------------------------------------|-----------------------|------|-----|
| <u>215</u> | 74 | Female | KRAS:c.34G>C (p.Gly12Arg) TP53:c.646G>A (p.Val216Met) Microsatellite Instability (MSI):MSS PD-L1 expression:positive TC<1% IC 10% Tumor Mutational Burden (TMB):4,77 Muts/MB ERCC1:Low expression RRM1:Low expression UGT1A1:WT (6/6) DPD:WT | positive TC<1% IC 10% | 4,77 | MSS |
| <u>216</u> | 67 | Male   | KRAS:c.34G>C (p.Gly12Arg) SMAD4:c.1081C>T (p.Arg361Cys)                                                                                                                                                                                      |                       |      |     |
| <u>217</u> | 64 | Male   | ALK fusion:HIP1(30) - ALK(20) Microsatellite Instability (MSI):MSS PD-L1 expression:negative TC<1% IC<1% Tumor Mutational Burden (TMB):3,79 Muts/MB                                                                                          | negative TC<1% IC<1%  | 3,79 | MSS |
| <u>218</u> | 73 | Male   | KRAS:c.35G>A (p.Gly12Asp) Microsatellite Instability (MSI):MSS PD-L1 expression:negative TC<1%, IC<1% Tumor Mutational Burden (TMB):3,85 Muts/MB                                                                                             | negative TC<1%, IC<1% | 3,85 | MSS |
| <u>219</u> | 57 | Male   | KRAS:c.35G>T (p.Gly12Val) TP53:c.510_517 delinsA (p.Glu171Ter) TP53:c.759_761delCAT (p.Ile255del)                                                                                                                                            |                       |      |     |
| <u>220</u> | 73 | Female | KRAS:c.436G>A (p.Ala146Thr)                                                                                                                                                                                                                  |                       |      |     |

|            |    |        |                                                                                                                                                                                                                                                                                                                                      |                        |      |     |
|------------|----|--------|--------------------------------------------------------------------------------------------------------------------------------------------------------------------------------------------------------------------------------------------------------------------------------------------------------------------------------------|------------------------|------|-----|
| <u>221</u> | 59 | Male   | Microsatellite Instability (MSI):MSS PD-L1 expression:negative TC<1%, IC<1% Tumor Mutational Burden (TMB):3,81 Muts/MB                                                                                                                                                                                                               | negative  TC<1%, IC<1% | 3,81 | MSS |
| <u>222</u> | 74 | Male   | KRAS:c.35G>T (p.Gly12Val)                                                                                                                                                                                                                                                                                                            |                        |      |     |
| <u>223</u> | 82 | Female | MUTYH:c.1012C>T (p.Gln338Ter) IDH2:c.514A>T (p.Arg172Trp) BAP1:c.1123G>T (p.Glu375Ter) PIK3R1:c.1690A>G (p.Asn564Asp) TP53:c.374C>A (p.Thr125Lys) EIF1AX:amplification SOS1:amplification STAG2:amplification Microsatellite Instability (MSI):MSS PD-L1 expression:negative TC<1%, IC<1% Tumor Mutational Burden (TMB):9,39 Muts/MB | negative  TC<1%, IC<1% | 9,39 | MSS |
| <u>224</u> | 51 | Male   | Microsatellite Instability (MSI):MSS Loss of Heterozygosity (LOH):LOHL 0% PD-L1 expression:negative TC<1% IC<1% Tumor Mutational Burden (TMB):2,85 Muts/MB                                                                                                                                                                           | negative  TC<1% IC<1%  | 2,85 | MSS |

|            |    |        |                                                                                                                                                                                                                                           |                        |       |     |
|------------|----|--------|-------------------------------------------------------------------------------------------------------------------------------------------------------------------------------------------------------------------------------------------|------------------------|-------|-----|
| <u>225</u> | 52 | Female | KRAS:c.35G>T (p.Gly12Val)  Microsatellite Instability (MSI):MSS  Loss of Heterozygosity (LOH):LOHH 30,51%  PD-L1 expression:negative TC<1%, IC<1%  Tumor Mutational Burden (TMB):17,96 Muts/MB  ERCC1:Low expression  TYMS:Low expression | negative  TC<1%, IC<1% | 17,96 | MSS |
| <u>226</u> | 67 | Male   | PTEN:c.517C>T (p.Arg173Cys)  Microsatellite Instability (MSI):MSS  PD-L1 expression:negative TC<1%, IC<1%  Tumor Mutational Burden (TMB):3,82 Muts/MB                                                                                     | negative  TC<1%, IC<1% | 3,82  | MSS |
| <u>227</u> | 45 | Male   | KRAS:c.35G>A (p.Gly12Asp)  TP53:c.637C>T (p.Arg213Ter)  Microsatellite Instability (MSI):MSS  PD-L1 expression:negative TC<1%, IC<1%  Tumor Mutational Burden (TMB):2,17 Muts/MB                                                          | negative  TC<1%, IC<1% | 2,17  | MSS |
| <u>228</u> | 63 | Female | KRAS:c.35G>T (p.Gly12Val)  TP53:c.524G>A (p.Arg175His)  Microsatellite Instability (MSI):MSS  PD-L1 expression:-   Tumor Mutational Burden (TMB):6,74 Muts/MB                                                                             | -                      | 6,74  | MSS |

|            |    |        |                                                                                                                                                                                                                                                                                                                                          |                              |      |     |
|------------|----|--------|------------------------------------------------------------------------------------------------------------------------------------------------------------------------------------------------------------------------------------------------------------------------------------------------------------------------------------------|------------------------------|------|-----|
| <u>229</u> | 59 | Female | CDKN2A:c.233_234delTC<br>(p.Leu78HisfsTer41) KRAS:c.3<br>4G>C<br>(p.Gly12Arg) Microsatellite<br>Instability (MSI):MSS Loss of<br>Heterozygosity (LOH):LOHL<br>0% PD-L1<br>expression:negative TC<1%,<br>IC<1% Tumor Mutational<br>Burden (TMB):0,97<br>Muts/MB ERCC1:High<br>expression TYMS:Low<br>expression UGT1A1:WT<br>(6/6) DPD:WT | negative <br>TC<1%,<br>IC<1% | 0,97 | MSS |
| <u>230</u> | 62 | Female | KRAS:c.35G>A<br>(p.Gly12Asp) TP53:c.559+1G><br>A ( ) Microsatellite Instability<br>(MSI):MSS Loss of<br>Heterozygosity (LOH):LOHL<br>3,64% PD-L1<br>expression:positive TC<1% IC<br>2% Tumor Mutational Burden<br>(TMB):4,93 Muts/MB                                                                                                     | positive T<br>C<1% IC<br>2%  | 4,93 | MSS |

|            |    |        |                                                                                                                                                                                                                                                                                                                       |                         |      |     |
|------------|----|--------|-----------------------------------------------------------------------------------------------------------------------------------------------------------------------------------------------------------------------------------------------------------------------------------------------------------------------|-------------------------|------|-----|
| <u>231</u> | 49 | Female | TP53:c.1001G>T (p.Gly334Val)  BRAF fusion:CCNY(1) - BRAF(10)  Microsatellite Instability (MSI):MSS  Loss of Heterozygosity (LOH):LOHH 28,13%  PD-L1 expression:positive TC<1%, IC 10%  Tumor Mutational Burden (TMB):3,84 Muts/MB  ERCC1:Low expression  TYMS:Low expression  UGT1A1:HOMOZYGOUS MUTATED (7/7)  DPD:WT | positive  TC<1%, IC 10% | 3,84 | MSS |
| <u>232</u> | 57 | Male   | KRAS:c.35G>A (p.Gly12Asp)  TP53:c.587G>C (p.Arg196Pro)  Microsatellite Instability (MSI):MSS  Loss of Heterozygosity (LOH):LOHH 23,21%  PD-L1 expression:positive TC<1% IC 10%  Tumor Mutational Burden (TMB):7,59 Muts/MB  ERCC1:High expression  TYMS:Low expression                                                | positive  TC<1% IC 10%  | 7,59 | MSS |

|            |    |        |                                                                                                                                                                                                                                                                       |                        |      |     |
|------------|----|--------|-----------------------------------------------------------------------------------------------------------------------------------------------------------------------------------------------------------------------------------------------------------------------|------------------------|------|-----|
| <u>233</u> | 70 | Female | KRAS:c.35G>T (p.Gly12Val)  TP53:c.743G>A (p.Arg248Gln)  PIK3CA:amplification  MECOM:amplification  Microsatellite Instability (MSI):MSS  Loss of Heterozygosity (LOH):LOHL 10,09%  PD-L1 expression:positive TC<1%, IC 2%  Tumor Mutational Burden (TMB):4,79 Muts/MB | positive  TC<1%, IC 2% | 4,79 | MSS |
| <u>234</u> | 73 | Male   | KRAS:c.35G>A (p.Gly12Asp)  Microsatellite Instability (MSI):MSS  PD-L1 expression:negative TC<1%, IC<1%  Tumor Mutational Burden (TMB):4,78 Muts/MB                                                                                                                   | negative  TC<1%, IC<1% | 4,78 | MSS |
| <u>235</u> | 73 | Male   | KRAS:c.34G>C (p.Gly12Arg)  CCND3:amplification  Microsatellite Instability (MSI):MSS  Loss of Heterozygosity (LOH):LOHH 43,49%  PD-L1 expression:negative TC<1%, IC<1%  Tumor Mutational Burden (TMB):5,75 Muts/MB                                                    | negative  TC<1%, IC<1% | 5,75 | MSS |
| <u>236</u> | 56 | Female | KRAS:c.35G>A (p.Gly12Asp)  Microsatellite Instability (MSI):MSS  PD-L1 expression:negative TC<1% IC<1%  Tumor Mutational Burden (TMB):0,98 Muts/MB                                                                                                                    | negative  TC<1% IC<1%  | 0,98 | MSS |

|            |    |        |                                                                                                                                                                                                                                                           |                          |      |     |
|------------|----|--------|-----------------------------------------------------------------------------------------------------------------------------------------------------------------------------------------------------------------------------------------------------------|--------------------------|------|-----|
| <u>237</u> | 70 | Male   | BLM:c.1720_1735del (p.Ala575ProfsTer38)  KRAS:c.35G>A (p.Gly12Asp)  NOTCH2:amplification  Microsatellite Instability (MSI):MSS  Loss of Heterozygosity (LOH):LOHL 7,63  PD-L1 expression:negative TC<1% IC<1%  Tumor Mutational Burden (TMB):1,94 Muts/MB | negative  TC<1% IC<1%    | 1,94 | MSS |
| <u>238</u> | 66 | Male   | KRAS:c.35G>A (p.Gly12Asp)  Microsatellite Instability (MSI):MSS  Loss of Heterozygosity (LOH):LOHL 7,75%  PD-L1 expression:negative TC<1%, IC<1%  Tumor Mutational Burden (TMB):1,9 Muts/MB                                                               | negative  TC<1%, IC<1%   | 1,9  | MSS |
| <u>239</u> | 68 | Female | AMER1:c.1138G>T (p.Glu380Ter)  KRAS:c.35G>A (p.Gly12Asp)  TP53:c.602delT (p.Leu201CysfsTer46)  Microsatellite Instability (MSI):MSS  PD-L1 expression:positive TC 20%, IC 15%  Tumor Mutational Burden (TMB):4 Muts/MB                                    | positive  TC 20%, IC 15% | 4    | MSS |

|            |    |        |                                                                                                                                                                                                                                                                 |                        |      |     |
|------------|----|--------|-----------------------------------------------------------------------------------------------------------------------------------------------------------------------------------------------------------------------------------------------------------------|------------------------|------|-----|
| <u>240</u> | 48 | Male   | KRAS:c.35G>T (p.Gly12Val)  TP53:c.524G>A (p.Arg175His)  Microsatellite Instability (MSI):MSS  PD-L1 expression:negative TC<1% IC<1%  Tumor Mutational Burden (TMB):4,95 Muts/MB  ERCC1:High expression  TYMS:Low expression  UGT1A1:HETEROZ YGOUS (6/7)  DPD:WT | negative  TC<1% IC<1%  | 4,95 | MSS |
| <u>241</u> | 75 | Female | KRAS:c.35G>T (p.Gly12Val)  TP53:c.818G>A (p.Arg273His)  Microsatellite Instability (MSI):MSS  PD-L1 expression:negative TC<1% IC<1%  Tumor Mutational Burden (TMB):1,95 Muts/MB                                                                                 | negative  TC<1% IC<1%  | 1,95 | MSS |
| <u>242</u> | 80 | Male   | KRAS:c.35G>C (p.Gly12Ala)  Microsatellite Instability (MSI):MSS  PD-L1 expression:negative TC<1% IC<1%  Tumor Mutational Burden (TMB):0,97 Muts/MB  ERCC1:High expression  TYMS:Low expression                                                                  | negative  TC<1% IC<1%  | 0,97 | MSS |
| <u>243</u> | 59 | Female | KRAS:c.35G>A (p.Gly12Asp)  Microsatellite Instability (MSI):MSS  Loss of Heterozygosity (LOH):LOHL 0%  PD-L1 expression:negative TC<1%, IC<1%  Tumor Mutational Burden (TMB):4,77 Muts/MB                                                                       | negative  TC<1%, IC<1% | 4,77 | MSS |

|            |    |        |                                                                                                                                                                                                                                                                    |                       |       |     |
|------------|----|--------|--------------------------------------------------------------------------------------------------------------------------------------------------------------------------------------------------------------------------------------------------------------------|-----------------------|-------|-----|
| <u>244</u> | 41 | Male   | HRAS:c.351G>T<br>(p.Lys117Asn) ATRX:c.3200C>A<br>(p.Ser1067Ter) NOTCH4:c.1845C>A<br>(p.Cys615Ter) Microsatellite Instability (MSI):MSS Loss of Heterozygosity (LOH):LOHH 66,58% PD-L1 expression:negative TC<1%, IC<1% Tumor Mutational Burden (TMB):12,41 Muts/MB | negative TC<1%, IC<1% | 12,41 | MSS |
| <u>245</u> | 69 | Female | KRAS:c.35G>T<br>(p.Gly12Val) TP53:c.470T>A<br>(p.Val157Asp) Microsatellite Instability (MSI):MSS PD-L1 expression:negative TC<1%, IC<1% Tumor Mutational Burden (TMB):2,85 Muts/MB                                                                                 | negative TC<1%, IC<1% | 2,85  | MSS |
| <u>246</u> | 49 | Male   | KRAS:c.35G>A<br>(p.Gly12Asp) Microsatellite Instability (MSI):MSS PD-L1 expression:positive TC 2% IC 10% Tumor Mutational Burden (TMB):2.98 Muts/MB                                                                                                                | positive TC 2% IC 10% | 2,98  | MSS |
| <u>247</u> | 42 | Male   | KRAS:c.35G>A<br>(p.Gly12Asp) Microsatellite Instability (MSI):MSS PD-L1 expression:negative TC<1% IC<1% Tumor Mutational Burden (TMB):7,2 Muts/MB                                                                                                                  | negative TC<1% IC<1%  | 7,2   | MSS |

|            |    |        |                                                                                                                                                                                                                                                                |                        |      |     |
|------------|----|--------|----------------------------------------------------------------------------------------------------------------------------------------------------------------------------------------------------------------------------------------------------------------|------------------------|------|-----|
| <u>248</u> | 60 | Female | BRCA2:c.7868A>G<br>(p.His2623Arg) NBN:c.2140C>T<br>(p.Arg714Ter) SMAD4:c.1140-2A>T (splicing) Microsatellite Instability (MSI):MSS Loss of Heterozygosity (LOH):LOHH 34,47 PD-L1 expression:negative TC<1% , IC<1% Tumor Mutational Burden (TMB): 6.63 Muts/MB | negative TC<1% , IC<1% | 6,63 | MSS |
| <u>249</u> | 77 | Female | KRAS:c.35G>A<br>(p.Gly12Asp) RAD50:c.326_329delCAGA<br>(p.Thr109AsnfsTer20) ATM:c.5497-2A>G                                                                                                                                                                    |                        |      |     |
| <u>250</u> | 56 | Female | KRAS:c.34G>C<br>(p.Gly12Arg) TP53:c.766_767insA<br>(p.Thr256AsnfsTer8) Microsatellite Instability (MSI):MSS Loss of Heterozygosity (LOH):LOHL 0% PD-L1 expression:negative TC<1% IC<1% Tumor Mutational Burden (TMB):3,83 Muts/MB                              | negative TC<1% IC<1%   | 3,83 | MSS |
| <u>251</u> | 40 | Male   | KRAS:c.35G>A<br>(p.Gly12Asp) TP53:c.817C>T<br>(p.Arg273Cys) Microsatellite Instability (MSI):MSS Loss of Heterozygosity (LOH):LOHL 0% PD-L1 expression:negative TC<1% IC<1% Tumor Mutational Burden (TMB):3,8 Muts/MB                                          | negative TC<1% IC<1%   | 3,8  | MSS |

|            |    |        |                                                                                                                                                                                                                                                                                                             |                             |      |     |
|------------|----|--------|-------------------------------------------------------------------------------------------------------------------------------------------------------------------------------------------------------------------------------------------------------------------------------------------------------------|-----------------------------|------|-----|
| <u>252</u> | 50 | Female | KRAS:c.35G>A<br>(p.Gly12Asp) TP53:c.701A>G<br>(p.Tyr234Cys) RB1:c.248delC<br>(p.Ser83LeufsTer28) PTPRT:c.<br>1843C>T<br>(p.Gln615Ter) Microsatellite<br>Instability (MSI):MSS PD-L1<br>expression:negative  Tumor<br>Mutational Burden (TMB):1,9<br>Muts/MB ERCC1:High<br>expression TYMS:Low<br>expression | negative                    | 1,9  | MSS |
| <u>253</u> | 46 | Male   | KRAS:c.35G>A<br>(p.Gly12Asp) Microsatellite<br>Instability (MSI):MSS PD-L1<br>expression:negative TC<1%<br>IC<1% Tumor Mutational<br>Burden (TMB):6,65<br>Muts/MB ERCC1:High<br>expression TYMS:Low<br>expression                                                                                           | negative <br>TC<1%<br>IC<1% | 6,65 | MSS |
| <u>254</u> | 68 | Male   | RAD51C:c.706-<br>2A>G KRAS:c.35G>A<br>(p.Gly12Asp) DDR1:c.1039C><br>T<br>(p.Gln347Ter) Microsatellite<br>Instability (MSI):MSS PD-L1<br>expression:negative TC<1%<br>IC<1% Tumor Mutational<br>Burden (TMB):3,8 Muts/MB                                                                                     | negative <br>TC<1%<br>IC<1% | 3,8  | MSS |

|            |    |        |                                                                                                                                                                                                                                                            |                              |      |     |
|------------|----|--------|------------------------------------------------------------------------------------------------------------------------------------------------------------------------------------------------------------------------------------------------------------|------------------------------|------|-----|
| <u>255</u> | 81 | Male   | KRAS:c.35G>A<br>(p.Gly12Asp) TP53:c.743G>A<br>(p.Arg248Gln) MGA:c.6984_6<br>987delTGAG<br>(p.Ser2328ArgfsTer6) CDKN2<br>B fusion:MTAP(5) - CDKN2B-<br>AS1-004(5) PD-L1<br>expression:negative TC<1%<br>IC<1% Tumor Mutational<br>Burden (TMB):3,82 Muts/MB | negative <br>TC<1%<br>IC<1%  | 3,82 |     |
| <u>256</u> | 72 | Female |                                                                                                                                                                                                                                                            |                              |      |     |
| <u>257</u> | 70 | Male   | KRAS:c.35G>T<br>(p.Gly12Val) Microsatellite<br>Instability (MSI):MSS PD-L1<br>expression:negative TC<1%,<br>IC<1% Tumor Mutational<br>Burden (TMB):6,22 Muts/MB                                                                                            | negative <br>TC<1%,<br>IC<1% | 6,22 | MSS |
| <u>258</u> | 71 | Male   | KRAS:c.35G>T<br>(p.Gly12Val) TP53:c.310C>T<br>(p.Gln104Ter) Microsatellite<br>Instability (MSI):MSS PD-L1<br>expression:negative TC<1%,<br>IC<1% Tumor Mutational<br>Burden (TMB):4,49 Muts/MB                                                             | negative <br>TC<1%,<br>IC<1% | 4,49 | MSS |

|            |    |        |                                                                                                                                                                                                                                                                                                                                             |                         |      |     |
|------------|----|--------|---------------------------------------------------------------------------------------------------------------------------------------------------------------------------------------------------------------------------------------------------------------------------------------------------------------------------------------------|-------------------------|------|-----|
| <u>259</u> | 65 | Male   | KRAS:c.35G>A (p.Gly12Asp)  UGT1A1:c.211G>A (p.Gly71Arg)  Microsatellite Instability (MSI):MSS  PD-L1 expression:positive IC 15%, TC<1%  Tumor Mutational Burden (TMB):1,27 Muts/MB  ERCC1:High expression  TYMS:Low expression                                                                                                              | positive  IC 15%, TC<1% | 1,27 | MSS |
| <u>260</u> | 55 | Male   | KRAS:c.35G>A (p.Gly12Asp)  TP53:c.159_160insG (p.Phe54ValfsTer3)                                                                                                                                                                                                                                                                            |                         |      |     |
| <u>261</u> | 69 | Female | KRAS:c.35G>T (p.Gly12Val)  TP53:c.89dupA (p.Asn30LysfsTer13)  Microsatellite Instability (MSI):MSS  Tumor Mutational Burden (TMB):4,77 Muts/MB                                                                                                                                                                                              |                         | 4,77 | MSS |
| <u>262</u> | 66 | Female | KRAS:c.183A>T (p.Gln61His)  ERBB2:amplification  KRAS:amplification  NTRK3:amplification  Microsatellite Instability (MSI):MSS  Loss of Heterozygosity (LOH):LOHL 12,33%  PD-L1 expression:negative TC<1%, IC<1%  Tumor Mutational Burden (TMB):4,79 Muts/MB  ERCC1:High expression  TYMS:Low expression  UGT1A1:HETEROZYGOUS (6/7)  DPD:WT | negative  TC<1%, IC<1%  | 4,79 | MSS |

|            |    |      |                                                                                                                                                                                                                                                                                                                                                       |                               |      |     |
|------------|----|------|-------------------------------------------------------------------------------------------------------------------------------------------------------------------------------------------------------------------------------------------------------------------------------------------------------------------------------------------------------|-------------------------------|------|-----|
| <u>263</u> | 67 | Male | KRAS:c.35G>A<br>(p.Gly12Asp) TP53:c.713G>T<br>(p.Cys238Phe) Microsatellite<br>Instability (MSI):MSS  Loss of<br>Heterozygosity (LOH):LOHL<br>9,41% PD-L1<br>expression:positive TC 2%,<br>IC<1% Tumor Mutational<br>Burden (TMB):1,99 Muts/MB                                                                                                         | positive T<br>C 2%,<br>IC<1%  | 1,99 | MSS |
| <u>264</u> | 64 | Male | KRAS:c.34G>C<br>(p.Gly12Arg) SMAD4:c.1333C<br>>T<br>(p.Arg445Ter) CDKN2A:c.196<br>delC<br>(p.His66ThrfsTer80) TP53:c.1<br>12C>T<br>(p.Gln38Ter) IKBKB:amplificat<br>ion Microsatellite Instability<br>(MSI):MSS  Loss of<br>Heterozygosity (LOH):LOHL<br>0% PD-L1<br>expression:negative TC<1%<br>IC<1% Tumor Mutational<br>Burden (TMB):5.71 Muts/MB | negative <br>TC<1%<br>IC<1%   | 5,71 | MSS |
| <u>265</u> | 57 | Male | KRAS:c.35G>A<br>(p.Gly12Asp) TP53:c.602_603<br>insT<br>(p.Leu201PhefsTer8) CCNE1:a<br>mplification AKT2:amplificati<br>on AXL:amplification Microsa<br>tellite Instability<br>(MSI):MSS  Loss of<br>Heterozygosity (LOH):LOHL<br>1.64 % PD-L1<br>expression:negative TC <1% IC<br><1% Tumor Mutational<br>Burden (TMB):1.9 Muts/MB                    | negative <br>TC <1% IC<br><1% | 1,9  | MSS |

|            |    |        |                                                                                                                                                                                                                                                                             |                              |      |     |
|------------|----|--------|-----------------------------------------------------------------------------------------------------------------------------------------------------------------------------------------------------------------------------------------------------------------------------|------------------------------|------|-----|
| <u>266</u> | 63 | Male   | KRAS:c.35G>A<br>(p.Gly12Asp) BCOR:c.3649C>T<br>(p.Arg1217Ter) Microsatellite<br>Instability (MSI):MSS PD-L1<br>expression:positive TC<1%, IC<br>5% Tumor Mutational Burden<br>(TMB):5,83 Muts/MB                                                                            | positive T<br>C<1%, IC<br>5% | 5,83 | MSS |
| <u>267</u> | 62 | Male   | NF1:c.5881A>T<br>(p.Lys1961Ter) PTPN11:c.205<br>G>A (p.Glu69Lys)                                                                                                                                                                                                            |                              |      |     |
| <u>268</u> | 62 | Female | KRAS:c.35G>A<br>(p.Gly12Asp) MSH3:c.2319-<br>1G>A<br>(splicing) ARID1A:c.4360C>T<br>(p.Gln1454Ter) Microsatellite<br>Instability (MSI):MSS PD-L1<br>expression:negative TC<1%<br>IC<1%  Tumor Mutational<br>Burden (TMB):4.82 Muts/MB                                       | negative <br>TC<1%<br>IC<1%  | 4,82 | MSS |
| <u>269</u> | 78 | Male   | KRAS:c.35G>T<br>(p.Gly12Val) TP53:c.817C>T<br>(p.Arg273Cys) Microsatellite<br>Instability (MSI):MSS PD-L1<br>expression:positive TC 2%,<br>IC<1% Tumor Mutational<br>Burden (TMB):2,91<br>Muts/MB ERCC1:High<br>expression TYMS:Low<br>expression UGT1A1:WT<br>(6/6) DPD:WT | positive T<br>C 2%,<br>IC<1% | 2,91 | MSS |
| <u>270</u> | 65 | Male   | KRAS:c.35G>T<br>(p.Gly12Val) TP53:c.743G>A<br>(p.Arg248Gln)                                                                                                                                                                                                                 |                              |      |     |

|            |    |        |                                                                                                                                                                                                                                                                        |                        |      |     |
|------------|----|--------|------------------------------------------------------------------------------------------------------------------------------------------------------------------------------------------------------------------------------------------------------------------------|------------------------|------|-----|
| <u>271</u> | 76 | Female | KRAS:c.35G>A (p.Gly12Asp) TP53:c.524G>A (p.Arg175His)  Microsatellite Instability (MSI):MSS  PD-L1 expression:negative TC<1% IC<1%  Tumor Mutational Burden (TMB):1.91 Muts/MB                                                                                         | negative  TC<1% IC<1%  | 1,91 | MSS |
| <u>272</u> | 75 | Female | KRAS:c.35G>A (p.Gly12Asp) TP53:c.920-1G>A (splicing)                                                                                                                                                                                                                   |                        |      |     |
| <u>273</u> | 54 | Male   | KRAS:c.35G>T (p.Gly12Val) MUTYH:c.89delC (p.Ala30GlufsTer28) TP53:c.742C>T (p.Arg248Trp)  Microsatellite Instability (MSI):MSS  PD-L1 expression:negative TC<1% IC<1%  Tumor Mutational Burden (TMB): 2.89 Muts/MB                                                     | negative  TC<1% IC<1%  | 2,89 | MSS |
| <u>274</u> | 41 | Male   | KRAS:c.35G>A (p.Gly12Asp) SMAD4:c.250-2A>G ( ) SMARCA4:c.4620_4627del GAAGATAA (p.Lys1541GlyfsTer37)  Microsatellite Instability (MSI):MSS  Loss of Heterozygosity (LOH):LOHH 25,42% PD-L1 expression:negative TC<1%, IC<1% Tumor Mutational Burden (TMB):3,82 Muts/MB | negative  TC<1%, IC<1% | 3,82 | MSS |
| <u>275</u> | 79 | Male   | Microsatellite Instability (MSI):MSS PD-L1 expression:negative TC<1% IC<1% Tumor Mutational Burden (TMB):3.14 Muts/MB                                                                                                                                                  | negative  TC<1% IC<1%  | 3,14 | MSS |

|            |    |        |                                                                                                                                                                                                                                                                                                                                                                                                |                              |      |     |
|------------|----|--------|------------------------------------------------------------------------------------------------------------------------------------------------------------------------------------------------------------------------------------------------------------------------------------------------------------------------------------------------------------------------------------------------|------------------------------|------|-----|
| <u>276</u> | 47 | Male   | KRAS:c.183A>C<br>(p.Gln61His) TP53:c.844C>T<br>(p.Arg282Trp) CDH1:c.1565+1<br>G>A ( ) CDH1:c.1320+1G>T<br>( ) KDM6A:c.737delT<br>(p.Leu246TyrfsTer4) Microsat<br>ellite Instability<br>(MSI):MSS PD-L1<br>expression:negative TC<1%,<br>IC<1% Tumor Mutational<br>Burden (TMB):3,18 Muts/MB                                                                                                    | negative <br>TC<1%,<br>IC<1% | 3,18 | MSS |
| <u>277</u> | 59 | Female | KRAS:c.34G>C<br>(p.Gly12Arg) ARID1A:c.31_56<br>del<br>(p.Ser11AlafsTer91) KDR:c.10<br>62C>A<br>(p.Tyr354Ter) TP53:c.743G>A<br>(p.Arg248Gln) FANCG:amplifi<br>cation Microsatellite<br>Instability (MSI):MSS PD-L1<br>expression:negative TC <1%<br>IC<1% Tumor Mutational<br>Burden (TMB):2.92<br>Muts/MB ERCC1:High<br>expression TYMS:Low<br>expression UGT1A1:HETEROZ<br>YGOUS (6/7) DPD:WT | negative <br>TC <1%<br>IC<1% | 2,92 | MSS |
| <u>278</u> | 60 | Male   | KRAS:c.183A>C<br>(p.Gln61His) Microsatellite<br>Instability (MSI):MSS PD-L1<br>expression:negative TC<1%,<br>IC<1% Tumor Mutational<br>Burden (TMB):7,02 Muts/MB                                                                                                                                                                                                                               | negative <br>TC<1%,<br>IC<1% | 7,02 | MSS |

|            |    |        |                                                                                                                                                                                                                                                                                                                                                                                                   |                              |       |     |
|------------|----|--------|---------------------------------------------------------------------------------------------------------------------------------------------------------------------------------------------------------------------------------------------------------------------------------------------------------------------------------------------------------------------------------------------------|------------------------------|-------|-----|
| <u>279</u> | 72 | Female | KRAS:c.34G>C<br>(p.Gly12Arg)  Microsatellite<br>Instability (MSI):MSS  Loss of<br>Heterozygosity (LOH):LOHL<br>0%  PD-L1<br>expression:negative TC<1%,<br>IC<1%  Tumor Mutational<br>Burden (TMB):0,95 Muts/MB                                                                                                                                                                                    | negative <br>TC<1%,<br>IC<1% | 0,95  | MSS |
| <u>280</u> | 66 | Female | KRAS:c.35G>C<br>(p.Gly12Ala)  TP53:c.742C>T<br>(p.Arg248Trp)  Microsatellite<br>Instability (MSI):MSS  Loss of<br>Heterozygosity (LOH):LOHH<br>36.49 %  PD-L1<br>expression:positive TC<1% IC<br>5%  Tumor Mutational Burden<br>(TMB):1.89 Muts/MB                                                                                                                                                | positive  T<br>C<1% IC<br>5% | 1,89  | MSS |
| <u>281</u> | 61 | Female | KRAS:c.34G>C<br>(p.Gly12Arg)  SMAD4:c.362T><br>A<br>(p.Leu121Ter)  TP53:c.817C>T<br>(p.Arg273Cys)  STAG2:c.1229<br>G>C<br>(p.Cys410Ser)  ABRAXAS1:c.11<br>33_1134insCCCAGTAA<br>(p.Gln379ProfsTer10)  Micros<br>atellite Instability<br>(MSI):MSS  Loss of<br>Heterozygosity (LOH):LOHH<br>27,76  PD-L1<br>expression:negative TC<1%,<br>IC<1%  Tumor Mutational<br>Burden (TMB):10,44<br>Muts/MB | negative <br>TC<1%,<br>IC<1% | 10,44 | MSS |

|            |    |        |                                                                                                                                                                                                                                                                                                                                                                                                                                                                                                                         |                       |      |     |
|------------|----|--------|-------------------------------------------------------------------------------------------------------------------------------------------------------------------------------------------------------------------------------------------------------------------------------------------------------------------------------------------------------------------------------------------------------------------------------------------------------------------------------------------------------------------------|-----------------------|------|-----|
| <u>282</u> | 84 | Female | KRAS:c.35G>A (p.Gly12Asp) DPYD:c.1905+1G>A TP53:c.817C>T (p.Arg273Cys) Microsatellite Instability (MSI):MSS Loss of Heterozygosity (LOH):LOHL 15,76% PD-L1 expression:negative TC<1%, IC<1% Tumor Mutational Burden (TMB):3,79 Muts/MB                                                                                                                                                                                                                                                                                  | negative TC<1%, IC<1% | 3,79 | MSS |
| <u>283</u> | 62 | Male   | MRE11A:c.1252_1253insA (p.Ile418AsnfsTer39) KRAS:c.35G>T (p.Gly12Val) ID3:amplification MCL1:amplification ELF3:amplification H3-3A:amplification PCBP1:amplification H3C2:amplification H1-4:amplification PIM1:amplification MET:amplification FANCF:amplification CDKN1B:amplification KNSTRN:amplification GNA13:amplification H3-3B:amplification Microsatellite Instability (MSI):MSS Loss of Heterozygosity (LOH):LOHH 42.67 % PD-L1 expression:negative TC<1%, IC<1% Tumor Mutational Burden (TMB):2.85 Muts/MB | negative TC<1%, IC<1% | 2,85 | MSS |

|            |    |        |                                                                                                                                                                                                                                                                                                                                     |                              |      |     |
|------------|----|--------|-------------------------------------------------------------------------------------------------------------------------------------------------------------------------------------------------------------------------------------------------------------------------------------------------------------------------------------|------------------------------|------|-----|
| <u>284</u> | 64 | Male   | KRAS:c.35G>A<br>(p.Gly12Asp) TP53:c.524G>A<br>(p.Arg175His) Microsatellite<br>Instability (MSI):MSS Loss of<br>Heterozygosity (LOH):LOHL<br>2.42 % PD-L1<br>expression:negative TC <1%<br>IC<1%  Tumor Mutational<br>Burden (TMB):0.95 Muts/MB                                                                                      | negative <br>TC <1%<br>IC<1% | 0,95 | MSS |
| <u>285</u> | 57 | Female | KRAS:c.35G>A<br>(p.Gly12Asp) Microsatellite<br>Instability (MSI):MSS PD-L1<br>expression:positive TC<1%, IC<br>1% Tumor Mutational Burden<br>(TMB):1,89<br>Muts/MB ERCC1:Low<br>expression TYMS:Low<br>expression UGT1A1:HOMOZY<br>GOYS MUTATED<br>(7/7) DPD:WT                                                                     | positive T<br>C<1%, IC<br>1% | 1,89 | MSS |
| <u>286</u> | 58 | Male   | KRAS:c.34G>C<br>(p.Gly12Arg) TP53:c.824G>A<br>(p.Cys275Tyr) Microsatellite<br>Instability (MSI):MSS Loss of<br>Heterozygosity (LOH):LOHL<br>7,61% PD-L1<br>expression:negative TC<1%,<br>IC<1% Tumor Mutational<br>Burden (TMB):2,85<br>Muts/MB ERCC1:Low<br>expression TYMS:Low<br>expression UGT1A1:HETEROZ<br>YGOUS (6/7) DPD:WT | negative <br>TC<1%,<br>IC<1% | 2,85 | MSS |

|            |    |        |                                                                                                                                                                                                                                                                     |                         |      |     |
|------------|----|--------|---------------------------------------------------------------------------------------------------------------------------------------------------------------------------------------------------------------------------------------------------------------------|-------------------------|------|-----|
| <u>287</u> | 58 | Female | KRAS:c.35G>A<br>(p.Gly12Asp) RAD50:c.326_329delCAGA<br>(p.Thr109AsnfsTer20)                                                                                                                                                                                         |                         |      |     |
| <u>288</u> | 52 | Female | KRAS:c.35G>A<br>(p.Gly12Asp) Microsatellite Instability (MSI):MSS Loss of Heterozygosity (LOH):LOHL 0% PD-L1 expression:negative TC<1%, IC<1% Tumor Mutational Burden (TMB):6,62 Muts/MB ERCC1:Low expression TYMS:Low expression UGT1A1:HETEROZ YGOUS (6/7) DPD:WT | negative  TC<1%, IC<1%  | 6,62 | MSS |
| <u>289</u> | 50 | Male   | KRAS:c.35G>T<br>(p.Gly12Val) TP53:c.808T>C<br>(p.Phe270Leu) FGFR3 fusion:FGFR3-TACC3 Microsatellite Instability (MSI):MSS Loss of Heterozygosity (LOH):LOHL 8,65% PD-L1 expression:positive TC 30%, IC 5% Tumor Mutational Burden (TMB):2,85 Muts/MB                | positive  TC 30%, IC 5% | 2,85 | MSS |
| <u>290</u> | 79 | Male   | PIK3CA:c.1633G>A<br>(p.Glu545Lys)                                                                                                                                                                                                                                   |                         |      |     |

|            |    |        |                                                                                                                                                                                                                                                                                            |                              |      |     |
|------------|----|--------|--------------------------------------------------------------------------------------------------------------------------------------------------------------------------------------------------------------------------------------------------------------------------------------------|------------------------------|------|-----|
| <u>291</u> | 58 | Female | KRAS:c.35G>T<br>(p.Gly12Val) RNF43:c.1204C>T<br>(p.Gln402Ter) TP53:c.455C>T<br>(p.Pro152Leu) Microsatellite<br>Instability (MSI):MSS Loss of<br>Heterozygosity (LOH):LOHL<br>5.33 % PD-L1<br>expression:negative TC <1%<br>IC<1%  Tumor Mutational<br>Burden (TMB):1.91 Muts/MB            | negative <br>TC <1%<br>IC<1% | 1,91 | MSS |
| <u>292</u> | 56 | Male   | NBN:c.654_658delAAAAC<br>(p.Lys219AsnfsTer16) FGFR1:<br>c.1731C>G<br>(p.Asn577Lys) TERT:amplifica<br>tion Microsatellite Instability<br>(MSI):MSS Loss of<br>Heterozygosity (LOH):LOHH<br>62,57% PD-L1<br>expression:negative TC<1%,<br>IC<1% Tumor Mutational<br>Burden (TMB):3,8 Muts/MB | negative <br>TC<1%,<br>IC<1% | 3,8  | MSS |
| <u>293</u> | 65 | Male   | KRAS:c.35G>T<br>(p.Gly12Val) TP53:c.380C>T<br>(p.Ser127Phe) Microsatellite<br>Instability (MSI):MSS Loss of<br>Heterozygosity (LOH):LOHL<br>13.64 % PD-L1<br>expression:negative TC <1%<br>IC<1%  Tumor Mutational<br>Burden (TMB):2.85 Muts/MB                                            | negative <br>TC <1%<br>IC<1% | 2,85 | MSS |

|            |    |        |                                                                                                                                                                                                                                                                                                                                           |                              |      |     |
|------------|----|--------|-------------------------------------------------------------------------------------------------------------------------------------------------------------------------------------------------------------------------------------------------------------------------------------------------------------------------------------------|------------------------------|------|-----|
| <u>294</u> | 59 | Female | KRAS:c.34G>C<br>(p.Gly12Arg)  Microsatellite<br>Instability (MSI):MSS  Tumor<br>Mutational Burden<br>(TMB):0,95 Muts/MB                                                                                                                                                                                                                   |                              | 0,95 | MSS |
| <u>295</u> | 57 | Male   | KRAS:c.35G>A<br>(p.Gly12Asp)  SMAD4:c.1096C<br>>T<br>(p.Gln366Ter)  Microsatellite<br>Instability (MSI):MSS  Loss of<br>Heterozygosity (LOH):LOHH<br>26,46%  PD-L1<br>expression:negative TC<1%,<br>IC<1%  Tumor Mutational<br>Burden (TMB):4,74<br>Muts/MB  ERCC1:High<br>expression  TYMS:Low<br>expression  UGT1A1:WT<br>(6/6)  DPD:WT | negative <br>TC<1%,<br>IC<1% | 4,74 | MSS |
| <u>296</u> | 54 | Male   | KRAS:c.34G>T (p.Gly12Cys) <br>GNAS:c.602G>A<br>(p.Arg201His)  ARID1A:c.1780<br>C>T<br>(p.Gln594Ter)  NOTCH4:c.104<br>4delC<br>(p.Gly349AlafsTer49)  Microsa<br>tellite Instability<br>(MSI):MSS  Tumor Mutational<br>Burden (TMB):4.76 Muts/MB                                                                                            |                              | 4,76 | MSS |

|            |    |        |                                                                                                                                                                                                                                                                                                       |                       |      |     |
|------------|----|--------|-------------------------------------------------------------------------------------------------------------------------------------------------------------------------------------------------------------------------------------------------------------------------------------------------------|-----------------------|------|-----|
| <u>297</u> | 57 | Female | KRAS:c.183A>C (p.Gln61His) TP53:c.378C>G (p.Tyr126Ter) H3C2:amplification Microsatellite Instability (MSI):MSS Loss of Heterozygosity (LOH):LOHL 0% PD-L1 expression:negative TC<1%, IC<1% Tumor Mutational Burden (TMB):4,73 Muts/MB ERCC1:Low expression TYMS:Low expression UGT1A1:WT (6/6) DPD:WT | negative TC<1%, IC<1% | 4,73 | MSS |
| <u>298</u> | 59 | Male   | EPHA2:c.1969C>T (p.Arg657Ter) PIK3CA:c.3140 A>G (p.His1047Arg) MYC:amplification Microsatellite Instability (MSI):MSS PD-L1 expression:positive TC 2%, IC<1% Tumor Mutational Burden (TMB):5,69 Muts/MB                                                                                               | positive TC 2%, IC<1% | 5,69 | MSS |
| <u>299</u> | 74 | Male   | BARD1:c.947T>G (p.Leu316Ter) AMER1:c.1489 C>T (p.Arg497Ter) Microsatellite Instability (MSI):MSS PD-L1 expression:negative TC<1% IC<1% Tumor Mutational Burden (TMB): Muts/MB ERCC1:High expression TYMS:Low expression UGT1A1:HETEROZYGOUS (6/7) DPD:WT                                              | negative TC<1% IC<1%  |      | MSS |

|            |    |        |                                                                                                                                                                                                                                                                                                                      |                              |      |     |
|------------|----|--------|----------------------------------------------------------------------------------------------------------------------------------------------------------------------------------------------------------------------------------------------------------------------------------------------------------------------|------------------------------|------|-----|
| <u>300</u> | 49 | Female | KRAS:c.35G>A<br>(p.Gly12Asp) TP53:c.524G>A<br>(p.Arg175His) SMAD4:c.133A<br>>G<br>(p.Lys45Glu) TGFB2:c.1232T<br>>C<br>(p.Leu411Pro) Microsatellite<br>Instability (MSI):MSS Loss of<br>Heterozygosity (LOH):LOHL<br>2,19% PD-L1<br>expression:negative TC<1%,<br>IC<1% Tumor Mutational<br>Burden (TMB):4,74 Muts/MB | negative <br>TC<1%,<br>IC<1% | 4,74 | MSS |
| <u>301</u> | 67 | Female | TP53:c.158G>A<br>(p.Trp53Ter) Microsatellite<br>Instability (MSI):MSS Loss of<br>Heterozygosity (LOH):LOHH<br>16,16% PD-L1<br>expression:negative TC<1%,<br>IC<1% Tumor Mutational<br>Burden (TMB):4,74<br>Muts/MB ERCC1:Low<br>expression TYMS:Low<br>expression                                                    | negative <br>TC<1%,<br>IC<1% | 4,74 | MSS |
| <u>302</u> | 70 | Female | KRAS:c.35G>T<br>(p.Gly12Val) TP53:c.659A>G<br>(p.Tyr220Cys) NCOR1:c.1519<br>C>T<br>(p.Arg507Ter) Microsatellite<br>Instability (MSI):MSS PD-L1<br>expression:positive TC<1%, IC<br>3% Tumor Mutational Burden<br>(TMB):2,84 Muts/MB                                                                                  | positive T<br>C<1%, IC<br>3% | 2,84 | MSS |

|            |    |        |                                                                                                                                                                                                                                                                                                                                                                                                        |                              |      |     |
|------------|----|--------|--------------------------------------------------------------------------------------------------------------------------------------------------------------------------------------------------------------------------------------------------------------------------------------------------------------------------------------------------------------------------------------------------------|------------------------------|------|-----|
| <u>303</u> | 64 | Female | KRAS:c.34G>C<br>(p.Gly12Arg) TP53:c.404G>A<br>(p.Cys135Tyr) Microsatellite<br>Instability (MSI):MSS PD-L1<br>expression:negative TC 1% IC<br><1%  Tumor Mutational<br>Burden (TMB):3.79<br>Muts/MB ERCC1:High<br>expression TYMS:Low<br>expression                                                                                                                                                     | negative <br>TC 1% IC<br><1% | 3,79 | MSS |
| <u>304</u> | 59 | Male   | KRAS:c.35G>A<br>(p.Gly12Asp) TP53:c.961A>T<br>(p.Lys321Ter) SF3B1:c.2098A<br>>G<br>(p.Lys700Glu) AURKC:c.420de<br>IA<br>(p.Glu140AspfsTer7) MYC:am<br>plification Microsatellite<br>Instability (MSI):MSS Loss of<br>Heterozygosity (LOH):LOHH<br>32,66% PD-L1<br>expression:positive TC 2%, IC<br>1% Tumor Mutational Burden<br>(TMB):2,85<br>Muts/MB ERCC1:High<br>expression TYMS:Low<br>expression | positive T<br>C 2%, IC<br>1% | 2,85 | MSS |
| <u>305</u> | 60 | Female | KRAS:c.35G>A<br>(p.Gly12Asp) TP53:c.743G>A<br>(p.Arg248Gln)                                                                                                                                                                                                                                                                                                                                            |                              |      |     |

|            |    |        |                                                                                                                                                                                                                                                                                                                                             |                              |      |     |
|------------|----|--------|---------------------------------------------------------------------------------------------------------------------------------------------------------------------------------------------------------------------------------------------------------------------------------------------------------------------------------------------|------------------------------|------|-----|
| <u>306</u> | 78 | Male   | KRAS:c.182A>G<br>(p.Gln61Arg) SF3B1:c.2098A>G<br>(p.Lys700Glu) TP53:c.844C>T<br>(p.Arg282Trp) BCL2L12:-<br> Microsatellite Instability<br>(MSI):MSS Loss of<br>Heterozygosity (LOH):LOHH<br>38.87 % PD-L1<br>expression:positive TC 20% IC<br>5% Tumor Mutational Burden<br>(TMB):3.79 Muts/MB                                              | positive T<br>C 20% IC<br>5% | 3,79 | MSS |
| <u>307</u> | 76 | Female | KRAS:c.35G>A<br>(p.Gly12Asp) CDC73:c.131+1<br>G>T<br>(splicing) RBM10:c.2661delA<br>(p.Glu888LysfsTer24) CDKN1<br>A:c.206_207insCG<br>(p.Leu71AlafsTer78) Microsat<br>ellite Instability<br>(MSI):MSS Loss of<br>Heterozygosity (LOH):LOHL<br>0% PD-L1 expression:positive<br>TC<1%, IC 5% Tumor<br>Mutational Burden<br>(TMB):5,71 Muts/MB | positive T<br>C<1%, IC<br>5% | 5,71 | MSS |
| <u>308</u> | 66 | Female | ARID1B:c.1618C>T<br>(p.Gln540Ter) Microsatellite<br>Instability (MSI):MSS Tumor<br>Mutational Burden (TMB):fail<br>Muts/MB                                                                                                                                                                                                                  |                              | fail | MSS |

|            |    |        |                                                                                                                                                                                                                                                                                                |                        |      |     |
|------------|----|--------|------------------------------------------------------------------------------------------------------------------------------------------------------------------------------------------------------------------------------------------------------------------------------------------------|------------------------|------|-----|
| <u>309</u> | 74 | Female | KRAS:c.35G>T (p.Gly12Val)  TP53:c.711G>T (p.Met237Ile)  Microsatellite Instability (MSI):MSS  Loss of Heterozygosity (LOH):LOHH 37,87%  PD-L1 expression:negative TC<1%, IC<1%  Tumor Mutational Burden (TMB):0,95 Muts/MB                                                                     | negative  TC<1%, IC<1% | 0,95 | MSS |
| <u>310</u> | 52 | Female | KRAS:c.35G>T (p.Gly12Val)  CDKN2A:c.150+1 G>T (splicing)  Microsatellite Instability (MSI):MSS  Loss of Heterozygosity (LOH):LOHL 9.58 %  PD-L1 expression:negative TC <1% IC<1%  Tumor Mutational Burden (TMB):2.84 Muts/MB                                                                   | negative  TC <1% IC<1% | 2,84 | MSS |
| <u>311</u> | 77 | Female | KRAS:c.35G>A (p.Gly12Asp)  TP53:c.722C>G (p.Ser241Cys)  SMAD4:c.1082 G>A (p.Arg361His)  CDKN2A:c.311 delT (p.Leu104ArgfsTer42)  Microsatellite Instability (MSI):MSS  Loss of Heterozygosity (LOH):LOHL 0%  PD-L1 expression:positive TC 5%, IC<1%  Tumor Mutational Burden (TMB):4,75 Muts/MB | positive  TC 5%, IC<1% | 4,75 | MSS |

|            |    |        |                                                                                                                                                                                                                                    |                        |      |     |
|------------|----|--------|------------------------------------------------------------------------------------------------------------------------------------------------------------------------------------------------------------------------------------|------------------------|------|-----|
| <u>312</u> | 37 | Female | KRAS:c.35G>T (p.Gly12Val)  Microsatellite Instability (MSI):MSS  PD-L1 expression:negative TC<1% IC<1%  Tumor Mutational Burden (TMB):11.7 Muts/MB  ERCC1:High expression  TYMS:Low expression  UGT1A1:HETEROZ YGOUS (6/7)  DPD:WT | negative  TC<1% IC<1%  | 11,7 | MSS |
| <u>313</u> | 73 | Male   | KRAS:c.35G>A (p.Gly12Asp)  FBXW7:c.1436G>A (p.Arg479Gln)  CREBBP:c.4232G>T (p.Gly1411Val)  Microsatellite Instability (MSI):MSS  PD-L1 expression:negative TC<1%, IC<1%  Tumor Mutational Burden (TMB):6,65 Muts/MB                | negative  TC<1%, IC<1% | 6,65 | MSS |
| <u>314</u> | 37 | Male   | Microsatellite Instability (MSI):MSS  Loss of Heterozygosity (LOH):LOHH 19.62 %  PD-L1 expression:negative TC <1%IC<1%  Tumor Mutational Burden (TMB):1.89 Muts/MB                                                                 | negative  TC <1%IC<1%  | 1,89 | MSS |
| <u>315</u> | 53 | Female | KRAS:c.35G>A (p.Gly12Asp)  TP53:c.374C>A (p.Thr125Lys)  Microsatellite Instability (MSI):MSS  Tumor Mutational Burden (TMB):4.74 Muts/MB                                                                                           |                        | 4,74 | MSS |

|            |    |        |                                                                                                                                                                                                                                                                                        |                        |      |     |
|------------|----|--------|----------------------------------------------------------------------------------------------------------------------------------------------------------------------------------------------------------------------------------------------------------------------------------------|------------------------|------|-----|
| <u>316</u> | 74 | Male   | KRAS:c.35G>T<br>(p.Gly12Val) TP53:c.342_343insG<br>(p.His115AlafsTer34) Microsatellite Instability (MSI):MSS Loss of Heterozygosity (LOH):LOHL 1.59 % PD-L1 expression:positive TC 25% IC <1% Tumor Mutational Burden (TMB):5.69 Muts/MB                                               | positive TC 25% IC <1% | 5,69 | MSS |
| <u>317</u> | 57 | Male   |                                                                                                                                                                                                                                                                                        |                        |      |     |
| <u>318</u> | 54 | Male   | KRAS:c.34G>C<br>(p.Gly12Arg) TP53:c.592G>T<br>(p.Glu198Ter) SMAD4:c.1051G>T<br>(p.Asp351Tyr) Microsatellite Instability (MSI):MSS PD-L1 expression negative TC<1%, IC<1% Tumor Mutational Burden (TMB):1,9 Muts/MB                                                                     | positive TC<1%, IC<1%  | 1,9  | MSS |
| <u>319</u> | 61 | Female | KRAS:c.34G>C<br>(p.Gly12Arg) TP53:c.844C>T<br>(p.Arg282Trp) Microsatellite Instability (MSI):MSS Loss of Heterozygosity (LOH):LOHL 0% PD-L1 expression:negative TC<1%, IC<1% Tumor Mutational Burden (TMB):1,9 Muts/MB ERCC1:Low expression TYMS:Low expression UGT1A1:WT (6/6) DPD:WT | negative TC<1%, IC<1%  | 1,9  | MSS |

|            |    |        |                                                                                                                                                                                                                                                            |                         |      |     |
|------------|----|--------|------------------------------------------------------------------------------------------------------------------------------------------------------------------------------------------------------------------------------------------------------------|-------------------------|------|-----|
| <u>320</u> | 58 | Female | KRAS:c.35G>A (p.Gly12Asp)  Microsatellite Instability (MSI):MSS  Loss of Heterozygosity (LOH):LOHL 5,52%  PD-L1 expression:positive TC 10%, IC 1%  Tumor Mutational Burden (TMB):5,7 Muts/MB                                                               | positive  TC 10%, IC 1% | 5,7  | MSS |
| <u>321</u> | 79 | Male   | KRAS:c.35G>A (p.Gly12Asp)  TP53:c.587G>C (p.Arg196Pro)  Microsatellite Instability (MSI):MSS  Loss of Heterozygosity (LOH):LOHL 2,39%  PD-L1 expression:positive TC 10%, IC<1%  Tumor Mutational Burden (TMB):3,81 Muts/MB                                 | positive  TC 10%, IC<1% | 3,81 | MSS |
| <u>322</u> | 69 | Female | KRAS:c.35G>T (p.Gly12Val)  SMAD4:c.1066C>A (p.Pro356Thr)  TGFBR2:c.1115T>C (p.Leu372Pro)  Microsatellite Instability (MSI):MSS  Loss of Heterozygosity (LOH):LOHL 0,79%  PD-L1 expression:negative TC<1%, IC<1%  Tumor Mutational Burden (TMB):3,8 Muts/MB | negative  TC<1%, IC<1%  | 3,8  | MSS |
| <u>323</u> | 52 | Male   | Microsatellite Instability (MSI):MSS  PD-L1 expression:negative TC<1%, IC<1%  Tumor Mutational Burden (TMB):0,95 Muts/MB                                                                                                                                   | negative  TC<1%, IC<1%  | 0,95 | MSS |

|            |    |        |                                                                                                                                                                                                                                                                                                      |                              |      |     |
|------------|----|--------|------------------------------------------------------------------------------------------------------------------------------------------------------------------------------------------------------------------------------------------------------------------------------------------------------|------------------------------|------|-----|
| <u>324</u> | 49 | Female | IDH1:c.395G>T<br>(p.Arg132Leu) MAP2K1:c.158<br>T>G<br>(p.Phe53Cys) EPHA2:c.594C><br>G<br>(p.Tyr198Ter) Microsatellite<br>Instability (MSI):MSS Loss of<br>Heterozygosity (LOH):LOHH<br>24,18% PD-L1<br>expression:negative TC<1%,<br>IC<1% Tumor Mutational<br>Burden (TMB):3,8 Muts/MB              | negative <br>TC<1%,<br>IC<1% | 3,8  | MSS |
| <u>325</u> | 70 | Male   | KRAS:c.35G>A<br>(p.Gly12Asp) MUTYH:c.734G><br>A<br>(p.Arg245His) TP53:c.925_94<br>1del<br>(p.Pro309LeufsTer22) Micros<br>atellite Instability<br>(MSI):MSS Loss of<br>Heterozygosity (LOH):LOHH<br>32,61% PD-L1<br>expression:negative TC<1%,<br>IC<1% Tumor Mutational<br>Burden (TMB):0,95 Muts/MB | negative <br>TC<1%,<br>IC<1% | 0,95 | MSS |
| <u>326</u> | 71 | Female | KRAS:c.34G>C<br>(p.Gly12Arg) Microsatellite<br>Instability (MSI):MSS PD-L1<br>expression:negative TC <1%<br>IC<1% Tumor Mutational<br>Burden (TMB):3.83 Muts/MB                                                                                                                                      | negative <br>TC <1%<br>IC<1% | 3,83 | MSS |

|            |    |        |                                                                                                                                                                                                                                                                                                        |                              |      |     |
|------------|----|--------|--------------------------------------------------------------------------------------------------------------------------------------------------------------------------------------------------------------------------------------------------------------------------------------------------------|------------------------------|------|-----|
| <u>327</u> | 72 | Male   | KRAS:c.35G>T<br>(p.Gly12Val)  Microsatellite<br>Instability (MSI):MSS  Loss of<br>Heterozygosity (LOH):LOHL<br>0%  PD-L1 expression:positive<br>TC<1% IC 2%  Tumor<br>Mutational Burden (TMB):0<br>Muts/MB                                                                                             | positive  T<br>C<1% IC<br>2% | 0    | MSS |
| <u>328</u> | 48 | Female | RAD51:c.817C>T<br>(p.Gln273Ter)  KRAS:c.35G>A<br>(p.Gly12Asp)  TP53:c.824_833<br>del<br>(p.Cys275LeufsTer67)  Micros<br>atellite Instability<br>(MSI):MSS  Loss of<br>Heterozygosity (LOH):LOHL<br>11,06%  PD-L1<br>expression:negative TC<1%,<br>IC<1%  Tumor Mutational<br>Burden (TMB):6,64 Muts/MB | negative <br>TC<1%,<br>IC<1% | 6,64 | MSS |
| <u>329</u> | 67 | Female | KRAS:c.35G>A<br>(p.Gly12Asp)  RECQL4:c.3236+<br>1G>C<br>(splicing)  U2AF1:c.101C>T<br>(p.Ser34Phe)  TP53:c.374C>T<br>(p.Thr125Met)  Microsatellite<br>Instability (MSI):MSS  PD-L1<br>expression:negative TC<1%<br>IC<1%  Tumor Mutational<br>Burden (TMB):5.68 Muts/MB                                | negative <br>TC<1%<br>IC<1%  | 5,68 | MSS |

|            |    |        |                                                                                                                                                                                                                                                 |                        |      |     |
|------------|----|--------|-------------------------------------------------------------------------------------------------------------------------------------------------------------------------------------------------------------------------------------------------|------------------------|------|-----|
| <u>330</u> | 66 | Male   | KRAS:c.34G>C (p.Gly12Arg) TP53:c.818G>T (p.Arg273Leu) Microsatellite Instability (MSI):MSS PD-L1 expression:negative TC<1% IC<1% Tumor Mutational Burden (TMB):1.9 Muts/MB                                                                      | negative  TC<1% IC<1%  | 1,9  | MSS |
| <u>331</u> | 74 | Male   | KRAS:c.35G>A (p.Gly12Asp) TP53:c.423_424 delCCinsG (p.Cys141TrpfsTer29) Microsatellite Instability (MSI):MSS Loss of Heterozygosity (LOH):LOHL 1.24 % PD-L1 expression:positive TC 1% IC<1% Tumor Mutational Burden (TMB):2.85 Muts/MB          | positive  TC 1% IC<1%  | 2,85 | MSS |
| <u>332</u> | 47 | Female | Microsatellite Instability (MSI):MSS PD-L1 expression:negative TC <1% IC<1% Tumor Mutational Burden (TMB):3.78 Muts/MB                                                                                                                          | negative  TC <1% IC<1% | 3,78 | MSS |
| <u>333</u> | 53 | Female | KRAS:c.35G>T (p.Gly12Val) MPL:amplification TP63:amplification AR:amplification Microsatellite Instability (MSI):MSS Loss of Heterozygosity (LOH):LOHL 5.74 % PD-L1 expression:negative TC <1% IC<1% Tumor Mutational Burden (TMB):4.76 Muts/MB | negative  TC <1% IC<1% | 4,76 | MSS |

|            |    |      |                                                                                                                                                                                                                                                                                                        |                              |      |     |
|------------|----|------|--------------------------------------------------------------------------------------------------------------------------------------------------------------------------------------------------------------------------------------------------------------------------------------------------------|------------------------------|------|-----|
| <u>334</u> | 51 | Male | KRAS:c.35G>T<br>(p.Gly12Val) SMAD4:c.1081C>T<br>(p.Arg361Cys) FAT1:c.4587_4588insCT<br>(p.Thr1531SerfsTer12) PARP2:amplification Microsatellite Instability (MSI):MSS Loss of Heterozygosity (LOH):LOHH<br>20.65 % PD-L1 expression:negative TC<1%<br>IC<1% Tumor Mutational Burden (TMB):7.57 Muts/MB | negative <br>TC<1%<br>IC<1%  | 7,57 | MSS |
| <u>335</u> | 70 | Male | KRAS:c.35G>A<br>(p.Gly12Asp) ARID1A:c.5573_5576delACTT<br>(p.His1858ProfsTer24) TP53:c.707A>G<br>(p.Tyr236Cys) Microsatellite Instability (MSI):MSS Loss of Heterozygosity (LOH):LOHL<br>9.06 % PD-L1 expression:negative TC <1%<br>IC<1% Tumor Mutational Burden (TMB):2.84 Muts/MB                   | negative <br>TC <1%<br>IC<1% | 2,84 | MSS |
| <u>336</u> | 53 | Male | KRAS:c.35G>A<br>(p.Gly12Asp) TP53:c.42delG<br>(p.Ser15ValfsTer29) Microsatellite Instability (MSI):MSS Loss of Heterozygosity (LOH):LOHL<br>6.69 % PD-L1 expression:negative TC <1%<br>IC<1% Tumor Mutational Burden (TMB):4.73 Muts/MB                                                                | negative <br>TC <1%<br>IC<1% | 4,73 | MSS |

|            |    |      |                                                                                                                                                                                                                                                                                                                                                                                       |                              |      |     |
|------------|----|------|---------------------------------------------------------------------------------------------------------------------------------------------------------------------------------------------------------------------------------------------------------------------------------------------------------------------------------------------------------------------------------------|------------------------------|------|-----|
| <u>337</u> | 65 | Male | KRAS:c.35G>A<br>(p.Gly12Asp) TP53:c.428T>C<br>(p.Val143Ala) TGFB2:c.1558<br>C>T<br>(p.Arg520Ter) RASA2:c.1359+<br>2T>C (splicing) Microsatellite<br>Instability (MSI):MSS Loss of<br>Heterozygosity (LOH):LOHL<br>11.11 % PD-L1 expression:-<br> Tumor Mutational Burden<br>(TMB):4.73<br>Muts/MB ERCC1:Low<br>expression TYMS:Low<br>expression UGT1A1:HETEROZ<br>YGOUS (6/7) DPD:WT | -                            | 4,73 | MSS |
| <u>338</u> | 68 | Male | NRAS:c.182A>G<br>(p.Gln61Arg) BAP1:c.287_288<br>delTG<br>(p.Leu96SerfsTer29) TP53:c.4<br>9delG<br>(p.Glu17LysfsTer27) Microsat<br>ellite Instability<br>(MSI):MSS Loss of<br>Heterozygosity (LOH):LOHL<br>2.57 % PD-L1<br>expression:negative TC <1%<br>IC<1% Tumor Mutational<br>Burden (TMB):3.79 Muts/MB                                                                           | negative <br>TC <1%<br>IC<1% | 3,79 | MSS |

|            |    |        |                                                                                                                                                                                                                                                                  |                          |      |     |
|------------|----|--------|------------------------------------------------------------------------------------------------------------------------------------------------------------------------------------------------------------------------------------------------------------------|--------------------------|------|-----|
| <u>339</u> | 71 | Male   | KRAS:c.34G>C (p.Gly12Arg)  ASXL1:c.427C>T (p.Arg143Ter)  KRAS:amplification  Microsatellite Instability (MSI):MSS  Loss of Heterozygosity (LOH):LOHH 27,82%  PD-L1 expression:positive TC 30%, IC 15%  Tumor Mutational Burden (TMB):7,59 Muts/MB                | positive  TC 30%, IC 15% | 7,59 | MSS |
| <u>340</u> | 51 | Female | KRAS:c.35G>T (p.Gly12Val)  RB1:c.1547G>A (p.Trp516Ter)                                                                                                                                                                                                           |                          |      |     |
| <u>341</u> | 73 | Male   | KRAS:c.35G>A (p.Gly12Asp)  CDKN2A:c.151-2A>G (splicing)  TGFBR2:c.190_191insA (p.Thr64AsnfsTer2)  Microsatellite Instability (MSI):MSS  Loss of Heterozygosity (LOH):LOHL 0 %  PD-L1 expression:negative TC<1% IC<1%  Tumor Mutational Burden (TMB):0.95 Muts/MB | negative  TC<1% IC<1%    | 0,95 | MSS |
| <u>342</u> | 65 | Male   | KRAS:c.35G>A (p.Gly12Asp)  Microsatellite Instability (MSI):MSS  Loss of Heterozygosity (LOH):LOHH 33,06%  PD-L1 expression:negative TC<1%, IC<1%  Tumor Mutational Burden (TMB):3,79 Muts/MB  ERCC1:High expression  TYMS:Low expression                        | negative  TC<1%, IC<1%   | 3,79 | MSS |

|            |    |        |                                                                                                                                                                                                                                                                                                                                                                                                                                                        |                               |      |     |
|------------|----|--------|--------------------------------------------------------------------------------------------------------------------------------------------------------------------------------------------------------------------------------------------------------------------------------------------------------------------------------------------------------------------------------------------------------------------------------------------------------|-------------------------------|------|-----|
| <u>343</u> | 63 | Female | KRAS:c.34G>C<br>(p.Gly12Arg)  Microsatellite<br>Instability (MSI):-  Genomic<br>Instability Score (GIS):GISL<br>3  Tumor Mutational Burden<br>(TMB):1,89 Muts/MB                                                                                                                                                                                                                                                                                       |                               | 1,89 | -   |
| <u>344</u> | 59 | Female | MRE11A:c.1252_1253insA<br>(p.Ile418AsnfsTer39)  KRAS:c.<br>34G>C<br>(p.Gly12Arg)  DPYD:c.1905+1<br>G>A  TP53:c.192delC<br>(p.Arg65GlufsTer58)  Microsat<br>ellite Instability<br>(MSI):MSS  Loss of<br>Heterozygosity (LOH):LOHH<br>23,95%  PD-L1<br>expression:positive TC<1%, IC<br>1%  Tumor Mutational Burden<br>(TMB):0,95<br>Muts/MB  ERCC1:High<br>expression  TYMS:Low<br>expression  UGT1A1:HOMOZY<br>GOUS MUTATED<br>(7/7)  DPD:HETEROZYGOUS | positive  T<br>C<1%, IC<br>1% | 0,95 | MSS |
| <u>345</u> | 53 | Male   | KRAS:c.35G>A<br>(p.Gly12Asp)  Microsatellite<br>Instability (MSI):MSS  Loss of<br>Heterozygosity (LOH):LOHL<br>0%  PD-L1<br>expression:negative TC<1%,<br>IC<1%  Tumor Mutational<br>Burden (TMB):8,55 Muts/MB                                                                                                                                                                                                                                         | negative <br>TC<1%,<br>IC<1%  | 8,55 | MSS |

|            |    |        |                                                                                                                                                                                                                                                                                                                                     |                                |      |     |
|------------|----|--------|-------------------------------------------------------------------------------------------------------------------------------------------------------------------------------------------------------------------------------------------------------------------------------------------------------------------------------------|--------------------------------|------|-----|
| <u>346</u> | 58 | Male   | KRAS:c.38G>A<br>(p.Gly13Asp) PMS1:c.793C>T<br>(p.Arg265Ter) TP53:c.488A>G<br>(p.Tyr163Cys)  Microsatellite<br>Instability (MSI):MSS  Loss of<br>Heterozygosity (LOH):LOHL 0<br>%  PD-L1 expression:positive<br>TC <1% IC 15% Tumor<br>Mutational Burden<br>(TMB):9.51 Muts/MB                                                       | positive  T<br>C <1% IC<br>15% | 9,51 | MSS |
| <u>347</u> | 51 | Male   | FANCL:c.2T>C<br>(p.Met1?) FGFR2<br>fusion:FGFR2(17) -<br>CCDC6(2)  Microsatellite<br>Instability (MSI):MSS  Loss of<br>Heterozygosity (LOH):LOHH<br>38,17%  PD-L1<br>expression:negative TC<1%,<br>IC<1%  Tumor Mutational<br>Burden (TMB):2,84 Muts/MB                                                                             | negative <br>TC<1%,<br>IC<1%   | 2,84 | MSS |
| <u>348</u> | 66 | Female | KRAS:c.34G>T<br>(p.Gly12Cys)  SMAD4:c.1309-<br>3A>G<br>( )  RNF43:c.153_154insATCA<br>(p.Pro521IlefsTer24)  RNASEH2<br>B:c.3G>A<br>(p.Met1?)  Microsatellite<br>Instability (MSI):MSS  Loss of<br>Heterozygosity (LOH):LOHH<br>16.61 %  PD-L1<br>expression:negative TC <1%<br>IC<1%  Tumor Mutational<br>Burden (TMB):6.65 Muts/MB | negative <br>TC <1%<br>IC<1%   | 6,65 | MSS |

|            |    |        |                                                                                                                                                                                                                                                                                                         |                       |      |     |
|------------|----|--------|---------------------------------------------------------------------------------------------------------------------------------------------------------------------------------------------------------------------------------------------------------------------------------------------------------|-----------------------|------|-----|
| <u>349</u> | 71 | Female | KRAS:c.35G>T (p.Gly12Val) DPYD:c.1905+1G>A BLM:c.1882+1G>A KMT2C:c.11460+1delG (splicing) TP53:c.473_473delGinsTT (p.Arg158LeufsTer23) Microsatellite Instability (MSI):MSS Loss of Heterozygosity (LOH):LOHL 10.74 % PD-L1 expression:negative TC <1% IC<1% Tumor Mutational Burden (TMB):2.86 Muts/MB | negative TC <1% IC<1% | 2,86 | MSS |
| <u>350</u> | 66 | Male   | KRAS:c.34G>C (p.Gly12Arg)                                                                                                                                                                                                                                                                               |                       |      |     |
| <u>351</u> | 55 | Female | KRAS:c.35G>A (p.Gly12Asp) SMAD4:c.1096C>T (p.Gln366Ter) TP53:c.1013del (p.Phe338SerfsTer7) Microsatellite Instability (MSI):MSS Loss of Heterozygosity (LOH):LOHL 10.02 % PD-L1 expression:negative TC<1% IC<1% Tumor Mutational Burden (TMB):2.84 Muts/MB ERCC1:Low expression TYMS:Low expression     | negative TC<1% IC<1%  | 2,84 | MSS |

|            |    |        |                                                                                                                                                                                                                                                                                                                                                                              |                              |      |     |
|------------|----|--------|------------------------------------------------------------------------------------------------------------------------------------------------------------------------------------------------------------------------------------------------------------------------------------------------------------------------------------------------------------------------------|------------------------------|------|-----|
| <u>352</u> | 61 | Male   | PALB2:c.719delC<br>(p.Pro240LeufsTer39) KRAS:c.<br>35G>T<br>(p.Gly12Val) SMAD4:c.533C><br>G<br>(p.Ser178Ter) PARP1:c.2848+<br>3A>G ( ) Microsatellite<br>Instability (MSI):MSS Loss of<br>Heterozygosity (LOH):LOHH<br>33.95 % PD-L1<br>expression:negative TC <1%<br>IC<1% Tumor Mutational<br>Burden (TMB):7.59<br>Muts/MB ERCC1:High<br>expression TYMS:Low<br>expression | negative <br>TC <1%<br>IC<1% | 7,59 | MSS |
| <u>353</u> | 48 | Male   | PTEN:c.760A>T<br>(p.Lys254Ter) APC:c.4435del<br>G<br>(p.Val1479SerfsTer28) Micros<br>atellite Instability<br>(MSI):MSS PD-L1<br>expression:negative TC <1%<br>IC<1% Tumor Mutational<br>Burden (TMB):FAIL Muts/MB                                                                                                                                                            | negative <br>TC <1%<br>IC<1% | FAIL | MSS |
| <u>354</u> | 68 | Female | KRAS:c.35G>A<br>(p.Gly12Asp) TP53:c.777_778<br>insC<br>(p.Ser260LeufsTer4) Microsat<br>ellite Instability<br>(MSI):MSS Loss of<br>Heterozygosity (LOH):LOHL 0<br>% PD-L1 expression:negative<br>TC <1% IC<1% Tumor<br>Mutational Burden (TMB):3.8<br>Muts/MB                                                                                                                 | negative <br>TC <1%<br>IC<1% | 3,8  | MSS |

|            |    |        |                                                                                                                                                                                                                                                                                                                                                                                  |                       |      |     |
|------------|----|--------|----------------------------------------------------------------------------------------------------------------------------------------------------------------------------------------------------------------------------------------------------------------------------------------------------------------------------------------------------------------------------------|-----------------------|------|-----|
| <u>355</u> | 62 | Male   | BRCA2:BRCA2 gene duplication KRAS:c.35G>A (p.Gly12Asp) SMAD4:c.1336C>T (p.Gln446Ter) JAK2:amplification Microsatellite Instability (MSI):MSS Loss of Heterozygosity (LOH):LOHH 31% PD-L1 expression:negative TC<1% IC<1% Tumor Mutational Burden (TMB):5.7 Muts/MB                                                                                                               | negative  TC<1% IC<1% | 5,7  | MSS |
| <u>356</u> | 63 | Female | KRAS:c.34G>T (p.Gly12Cys) DPYD:c.1905+1G>A STK11:c.527A>T (p.Asp176Val) STK11:c.527A>T (p.Asp176Val) TP53:c.853G>A (p.Glu285Lys) Microsatellite Instability (MSI):MSS Loss of Heterozygosity (LOH):LOHL 0% PD-L1 expression:positive TC 1% IC<1% Tumor Mutational Burden (TMB):9.49 Muts/MB ERCC1:High expression TYMS:Low expression UGT1A1:HETEROZYGOUS (6/7) DPD:HETEROZYGOUS | positive  TC 1% IC<1% | 9,49 | MSS |
| <u>357</u> | 83 | Female | KRAS:c.34G>C (p.Gly12Arg) TP53:c.499C>T (p.Gln167Ter)                                                                                                                                                                                                                                                                                                                            |                       |      |     |

|            |    |        |                                                                                                                                                                                                                                                                                               |                              |      |     |
|------------|----|--------|-----------------------------------------------------------------------------------------------------------------------------------------------------------------------------------------------------------------------------------------------------------------------------------------------|------------------------------|------|-----|
| <u>358</u> | 47 | Female | KRAS:c.35G>T<br>(p.Gly12Val) CHEK2:c.470T>C<br>(p.Ile157Thr) CDKN2A:c.291_292delGC<br>(p.His98ProfsTer21) TP53:c.844C>T<br>(p.Arg282Trp) TP53:c.578A>T<br>(p.His193Leu) Microsatellite Instability (MSI):MSS PD-L1 expression:negative TC<1% IC<1% Tumor Mutational Burden (TMB):8.65 Muts/MB | negative <br>TC<1%<br>IC<1%  | 8,65 | MSS |
| <u>359</u> | 68 | Male   | BRCA2: BRAF:c.1462_1476del ACAGCACCTACACCT<br>(p.Thr488_Pro492del) TP53:c.659A>G<br>(p.Tyr220Cys) CCNE1:amplification Microsatellite Instability (MSI):MSS Loss of Heterozygosity (LOH):LOHH 34.81 % PD-L1 expression:negative TC <1% IC<1% Tumor Mutational Burden (TMB):0.95 Muts/MB        | negative <br>TC <1%<br>IC<1% | 0,95 | MSS |

|            |    |        |                                                                                                                                                                                                                                                                                                                                                                                                       |                        |      |     |
|------------|----|--------|-------------------------------------------------------------------------------------------------------------------------------------------------------------------------------------------------------------------------------------------------------------------------------------------------------------------------------------------------------------------------------------------------------|------------------------|------|-----|
| <u>360</u> | 54 | Female | KRAS:c.35G>A<br>(p.Gly12Asp)  SMAD4:c.1333C>T<br>(p.Arg445Ter)  TP53:c.725G>A<br>(p.Cys242Tyr)  Microsatellite Instability (MSI):MSS  PD-L1 expression:positive TC 5%, IC<1%  Tumor Mutational Burden (TMB):1,9 Muts/MB  ERCC1:Low expression  TYMS:Low expression                                                                                                                                    | positive  TC 5%, IC<1% | 1,9  | MSS |
| <u>361</u> | 71 | Male   | KRAS:c.35G>A<br>(p.Gly12Asp)  FANCL:c.1110_1113dup<br>(p.Thr372AsnfsTer13)  CDKN2A:c.181G>T<br>(p.Glu61Ter)  SMARCA4:c.2741delT<br>(p.Leu914ArgfsTer36)  TP53:c.527G>A<br>(p.Cys176Tyr)  Microsatellite Instability (MSI):MSS  Loss of Heterozygosity (LOH):LOHH 16,2%  PD-L1 expression:positive TC 1%, IC<1%  Tumor Mutational Burden (TMB):6,64 Muts/MB  ERCC1:Low expression  TYMS:Low expression | positive  TC 1%, IC<1% | 6,64 | MSS |

|            |    |        |                                                                                                                                                                                                                                                                                                  |                              |     |     |
|------------|----|--------|--------------------------------------------------------------------------------------------------------------------------------------------------------------------------------------------------------------------------------------------------------------------------------------------------|------------------------------|-----|-----|
| <u>362</u> | 75 | Female | KRAS:c.35G>T<br>(p.Gly12Val) TP53:c.817C>T<br>(p.Arg273Cys) SMAD4:c.1333<br>C>T<br>(p.Arg445Ter) RB1:c.219_220<br>dup<br>(p.Ala74GlufsTer4) Microsatel<br>lite Instability (MSI):MSS PD-<br>L1 expression:negative<br>TC<1%, IC<1% Tumor<br>Mutational Burden (TMB):1,9<br>Muts/MB               | negative <br>TC<1%,<br>IC<1% | 1,9 | MSS |
| <u>363</u> | 39 | Male   | KRAS:c.34G>C<br>(p.Gly12Arg) TP53:c.586C>T<br>(p.Arg196Ter) Microsatellite<br>Instability (MSI):MSS PD-L1<br>expression:negative TC<1%,<br>IC<1% Tumor Mutational<br>Burden (TMB):0 Muts/MB                                                                                                      | negative <br>TC<1%,<br>IC<1% | 0   | MSS |
| <u>364</u> | 51 | Female | KRAS:c.35G>A<br>(p.Gly12Asp) TP53:c.673-<br>1G>A<br>(splicing) KMT2C:c.3869delG<br>(p.Arg1290LysfsTer13) Micros<br>atellite Instability<br>(MSI):MSS PD-L1<br>expression:negative TC<1%,<br>IC<1% Tumor Mutational<br>Burden (TMB):1,9<br>Muts/MB ERCC1:Low<br>expression TYMS:Low<br>expression | negative <br>TC<1%,<br>IC<1% | 1,9 | MSS |

|            |    |        |                                                                                                                                                                                                                                     |                        |      |     |
|------------|----|--------|-------------------------------------------------------------------------------------------------------------------------------------------------------------------------------------------------------------------------------------|------------------------|------|-----|
| <u>365</u> | 81 | Female | KRAS:c.35G>A (p.Gly12Asp) TP53:c.524G>A (p.Arg175His)  Microsatellite Instability (MSI):MSS  PD-L1 expression:positive TC<1% IC 5% Tumor Mutational Burden (TMB):1.9 Muts/MB                                                        | positive  TC<1% IC 5%  | 1,9  | MSS |
| <u>366</u> | 41 | Female | KRAS:c.182_184delinsGAA (p.Gln61_Glu62delinsArgLys)  TP53:c.319_320dup (p.Gly108ThrfsTer16)  Microsatellite Instability (MSI):MSS Tumor Mutational Burden (TMB):1.9 Muts/MB                                                         |                        | 1,9  | MSS |
| <u>367</u> | 58 | Male   | KRAS:c.35G>A (p.Gly12Asp)  Microsatellite Instability (MSI):MSS  PD-L1 expression:negative TC<1%, IC<1% Tumor Mutational Burden (TMB):6,67 Muts/MB                                                                                  | negative  TC<1%, IC<1% | 6,67 | MSS |
| <u>368</u> | 41 | Female | KRAS:c.34G>C (p.Gly12Arg) TP53:c.817C>T (p.Arg273Cys) ARID1A:c.3664_3668delGGGCGinsAGC (p.Gly1222SerfsTer5)  Microsatellite Instability (MSI):MSS PD-L1 expression:negative TC<1%, IC<1% Tumor Mutational Burden (TMB):2,84 Muts/MB | negative  TC<1%, IC<1% | 2,84 | MSS |

|            |    |        |                                                                                                                                                                                                                                                                                                                            |                              |      |     |
|------------|----|--------|----------------------------------------------------------------------------------------------------------------------------------------------------------------------------------------------------------------------------------------------------------------------------------------------------------------------------|------------------------------|------|-----|
| <u>369</u> | 48 | Male   | KRAS:c.34G>C<br>(p.Gly12Arg) TP53:c.916C>T<br>(p.Arg306Ter) Microsatellite<br>Instability (MSI):MSS PD-L1<br>expression:negative TC<1%<br>IC<1% Tumor Mutational<br>Burden (TMB):1.91 Muts/MB                                                                                                                              | negative <br>TC<1%<br>IC<1%  | 1,91 | MSS |
| <u>370</u> | 71 | Female | KRAS:c.35G>A<br>(p.Gly12Asp) TP53:c.725G>T<br>(p.Cys242Phe) Microsatellite<br>Instability (MSI):MSS PD-L1<br>expression:negative TC<1%,<br>IC<1% Tumor Mutational<br>Burden (TMB):4,76 Muts/MB                                                                                                                             | negative <br>TC<1%,<br>IC<1% | 4,76 | MSS |
| <u>371</u> | 71 | Female | KRAS:c.34G>C<br>(p.Gly12Arg) SMAD4:c.1052A<br>>T<br>(p.Asp351Val) RNF43:c.433C><br>T<br>(p.Arg145Ter) TP53:c.637C>T<br>(p.Arg213Ter) AURKA:c.1187<br>_1188del<br>(p.Lys396ArgfsTer4) Microsat<br>ellite Instability<br>(MSI):MSS PD-L1<br>expression:negative TC<1%<br>IC<1% Tumor Mutational<br>Burden (TMB):6.65 Muts/MB | negative <br>TC<1%<br>IC<1%  | 6,65 | MSS |

|            |    |        |                                                                                                                                                                                                                                                                                                    |                       |      |     |
|------------|----|--------|----------------------------------------------------------------------------------------------------------------------------------------------------------------------------------------------------------------------------------------------------------------------------------------------------|-----------------------|------|-----|
| <u>372</u> | 74 | Male   | KRAS:c.35G>T<br>(p.Gly12Val) CDKN2A:c.153_154insG<br>(p.Met52AspfsTer68) ARID1A:c.5202T>A<br>(p.Tyr1734Ter) TP53:c.743G>A<br>(p.Arg248Gln) RASA1:c.1288C>T<br>(p.Gln430Ter) Microsatellite Instability (MSI):MSS PD-L1 expression:positive TC<1% IC 10% Tumor Mutational Burden (TMB):7.62 Muts/MB | positive TC<1% IC 10% | 7,62 | MSS |
| <u>373</u> | 58 | Female | Microsatellite Instability (MSI):MSS PD-L1 expression:negative TC<1%, IC<1% Tumor Mutational Burden (TMB): Muts/MB                                                                                                                                                                                 | negative TC<1%, IC<1% |      | MSS |
| <u>374</u> | 67 | Male   | KRAS:c.34G>C<br>(p.Gly12Arg) CDKN2A:c.45G>A<br>(p.Trp15Ter) KDM6A:c.2588_2589insA<br>(p.Ser864GlufsTer11) TP53:c.713G>A<br>(p.Cys238Tyr) Microsatellite Instability (MSI):MSS PD-L1 expression:negative TC<1% IC<1%  Tumor Mutational Burden (TMB):2.85 Muts/MB                                    | negative TC<1% IC<1%  | 2,85 | MSS |

|            |    |      |                                                                                                                                                                                                                                                                                                                                   |                      |      |     |
|------------|----|------|-----------------------------------------------------------------------------------------------------------------------------------------------------------------------------------------------------------------------------------------------------------------------------------------------------------------------------------|----------------------|------|-----|
| <u>375</u> | 60 | Male | KRAS:c.35G>T<br>(p.Gly12Val) PIK3CA:c.3139C>T<br>(p.His1047Tyr) MAP2K7:c.289C>T<br>(p.Gln97Ter) TP53:c.734G>A<br>(p.Gly245Asp) Microsatellite Instability (MSI):MSS Loss of Heterozygosity (LOH):LOHL 12.67 % PD-L1 expression:negative TC<1% IC<1% Tumor Mutational Burden (TMB):2.85 Muts/MB                                    | negative TC<1% IC<1% | 2,85 | MSS |
| <u>376</u> | 59 | Male | KRAS:c.35G>T<br>(p.Gly12Val) CDKN2A:c.174_207del<br>(p.Val59ProfsTer76) TP53:c.723delC<br>(p.Cys242AlafsTer5) CCND2:amplification Microsatellite Instability (MSI):MSS PD-L1 expression:negative TC<1% IC<1% Tumor Mutational Burden (TMB):2.87 Muts/MB ERCC1:Low expression TYMS:Low expression UGT1A1:HETEROZYGOUS (6/7) DPD:WT | negative TC<1% IC<1% | 2,87 | MSS |

|            |    |        |                                                                                                                                                                                                                                                                  |                       |      |     |
|------------|----|--------|------------------------------------------------------------------------------------------------------------------------------------------------------------------------------------------------------------------------------------------------------------------|-----------------------|------|-----|
| <u>377</u> | 37 | Female | KRAS:c.35G>T<br>(p.Gly12Val) SMAD4:c.431C>A<br>(p.Ser144Ter) TP53:c.469G>C<br>(p.Val157Leu) RNF43:c.1624_1651del<br>(p.Gln543AlafsTer148) Microsatellite Instability (MSI):MSS PD-L1 expression:negative TC<1%, IC<1% Tumor Mutational Burden (TMB):4,76 Muts/MB | negative TC<1%, IC<1% | 4,76 | MSS |
| <u>378</u> | 61 | Male   | KRAS:c.38G>A<br>(p.Gly13Asp) BAP1:c.783+2T>C CDKN2A:c.151-1G>T (splicing) Microsatellite Instability (MSI):MSS PD-L1 expression:positive TC<1%, IC 2% Tumor Mutational Burden (TMB):5,71 Muts/MB                                                                 | positive TC<1%, IC 2% | 5,71 | MSS |
| <u>379</u> | 45 | Male   | KRAS:c.182_183delinsTG (p.Gln61Leu) Microsatellite Instability (MSI):MSS PD-L1 expression:negative TC<1% IC<1% Tumor Mutational Burden (TMB):1.93 Muts/MB                                                                                                        | negative TC<1% IC<1%  | 1,93 | MSS |

|            |    |        |                                                                                                                                                                                                                                                                            |                        |      |     |
|------------|----|--------|----------------------------------------------------------------------------------------------------------------------------------------------------------------------------------------------------------------------------------------------------------------------------|------------------------|------|-----|
| <u>380</u> | 55 | Male   | BRCA1:gene duplication KRAS:c.35G>A (p.Gly12Asp) CDKN2A:c.329G>A (p.Trp110Ter) TP53:c.637C>T (p.Arg213Ter) Microsatellite Instability (MSI):MSS Loss of Heterozygosity (LOH):LOHH 24.82 % PD-L1 expression:negative TC<1% IC<1% Tumor Mutational Burden (TMB):3.82 Muts/MB | negative  TC<1% IC<1%  | 3,82 | MSS |
| <u>381</u> | 36 | Male   | KRAS:c.35G>T (p.Gly12Val) SMAD4:c.170_173del (p.Leu57Ter) TP53:c.646G>T (p.Val216Leu) Microsatellite Instability (MSI):MSS Tumor Mutational Burden (TMB):1,9 Muts/MB                                                                                                       |                        | 1,9  | MSS |
| <u>382</u> | 49 | Male   | PALB2:c.2257C>T (p.Arg753Ter) KRAS:c.35G>A (p.Gly12Asp) Microsatellite Instability (MSI):MSS PD-L1 expression:negative TC<1%, IC<1% Tumor Mutational Burden (TMB):3,8 Muts/MB                                                                                              | negative  TC<1%, IC<1% | 3,8  | MSS |
| <u>383</u> | 66 | Female | KRAS:c.34G>C (p.Gly12Arg) TP53:c.820G>T (p.Val274Phe) Microsatellite Instability (MSI):MSS PD-L1 expression:positive TC<1%, IC<1% Tumor Mutational Burden (TMB):4,75 Muts/MB                                                                                               | positive  TC<1%, IC<1% | 4,75 | MSS |

|            |    |        |                                                                                                                                                                                                                                           |                       |      |     |
|------------|----|--------|-------------------------------------------------------------------------------------------------------------------------------------------------------------------------------------------------------------------------------------------|-----------------------|------|-----|
| <u>384</u> | 59 | Female | WT1:c.662-1G>T (splicing) TP53:c.673-2A>G (splicing) Microsatellite Instability (MSI):MSS Loss of Heterozygosity (LOH):LOHH 61.85 % PD-L1 expression:positive TC1% IC<1% Tumor Mutational Burden (TMB):5.71 Muts/MB                       | positive TC1% IC<1%   | 5,71 | MSS |
| <u>385</u> | 63 | Female | KRAS:c.35G>A (p.Gly12Asp) Microsatellite Instability (MSI):MSS Tumor Mutational Burden (TMB):7.64 Muts/MB                                                                                                                                 |                       | 7,64 | MSS |
| <u>386</u> | 84 | Female | KRAS:c.34G>C (p.Gly12Arg) TP53:c.376-2A>G (splicing) Microsatellite Instability (MSI):MSS PD-L1 expression:negative TC<1%, IC<1% Tumor Mutational Burden (TMB):3,8 Muts/MB                                                                | negative TC<1%, IC<1% | 3,8  | MSS |
| <u>387</u> | 80 | Male   | KRAS:c.34G>C (p.Gly12Arg)                                                                                                                                                                                                                 |                       |      |     |
| <u>388</u> | 86 | Female | KRAS:c.35G>T (p.Gly12Val) PIK3CA:c.1636C>G (p.Gln546Glu) ARID2:c.1750G>T (p.Glu584Ter) TP53:c.844C>T (p.Arg282Trp) Microsatellite Instability (MSI):MSS PD-L1 expression:negative TC<1%, IC<1% Tumor Mutational Burden (TMB):3,82 Muts/MB | negative TC<1%, IC<1% | 3,82 | MSS |

|            |    |      |                                                                                                                                                                                                                                   |                          |      |     |
|------------|----|------|-----------------------------------------------------------------------------------------------------------------------------------------------------------------------------------------------------------------------------------|--------------------------|------|-----|
| <u>389</u> | 59 | Male | KRAS:c.35G>T<br>(p.Gly12Val) ARID1A:c.6105_6106dup<br>(p.Glu2036GlyfsTer7) SMAD4:c.1037delC<br>(p.Pro346LeufsTer38) TP53:c.596G>T<br>(p.Gly199Val) Microsatellite Instability (MSI):MSS Tumor Mutational Burden (TMB):3.8 Muts/MB |                          | 3,8  | MSS |
| <u>390</u> | 73 | Male | KRAS:c.35G>A<br>(p.Gly12Asp) CDKN2A:c.130deIT<br>(p.Tyr44ThrfsTer9) TP53:c.711G>T<br>(p.Met237Ile) Microsatellite Instability (MSI):MSS PD-L1 expression:positive TC 30% IC<1% Tumor Mutational Burden (TMB):FAIL Muts/MB         | positive TC 30%<br>IC<1% | FAIL | MSS |
| <u>391</u> | 48 | Male | FANCL:c.2T>C<br>(p.Ala2_Met74del) KRAS:c.35G>A<br>(p.Gly12Asp) TP53:c.660T>G<br>(p.Tyr220Ter) Microsatellite Instability (MSI):MSS PD-L1 expression:negative TC<1% IC<1%  Tumor Mutational Burden (TMB):7.6 Muts/MB               | negative TC<1%<br>IC<1%  | 7,6  | MSS |

|            |    |      |                                                                                                                                                                                                                                                    |                             |       |     |
|------------|----|------|----------------------------------------------------------------------------------------------------------------------------------------------------------------------------------------------------------------------------------------------------|-----------------------------|-------|-----|
| <u>392</u> | 62 | Male | ATM:c.9170G>C<br>(p.Ter3057Ser) GNAS:c.601C>T<br>(p.Arg201Cys) Microsatellite<br>Instability (MSI):MSS PD-L1<br>expression:negative TC<1%<br>IC<1%  Tumor Mutational<br>Burden (TMB):3.9<br>Muts/MB ERCC1:Low<br>expression TYMS:Low<br>expression | negative <br>TC<1%<br>IC<1% | 3,9   | MSS |
| <u>393</u> | 82 | Male | KRAS:c.35G>A<br>(p.Gly12Asp) AKT1:c.49G>A<br>(p.Glu17Lys) CTNNB1:c.97T>G<br>(p.Ser33Ala) Microsatellite<br>Instability (MSI):MSS PD-L1<br>expression:negative TC<1%<br>IC<1%  Tumor Mutational<br>Burden (TMB):12.34<br>Muts/MB                    | negative <br>TC<1%<br>IC<1% | 12,34 | MSS |
| <u>394</u> | 65 | Male | Microsatellite Instability<br>(MSI):MSS Tumor Mutational<br>Burden (TMB):1.92<br>Muts/MB ERCC1:High<br>expression TYMS:Low<br>expression UGT1A1:WT<br>(6/6) DPD:WT                                                                                 |                             | 1,92  | MSS |

|            |    |        |                                                                                                                                                                                                                                                                               |                       |       |     |
|------------|----|--------|-------------------------------------------------------------------------------------------------------------------------------------------------------------------------------------------------------------------------------------------------------------------------------|-----------------------|-------|-----|
| <u>395</u> | 79 | Female | KRAS:c.182A>G (p.Gln61Arg) TP53:c.586C>T (p.Arg196Ter) RNF43:c.1111C>T (p.Arg371Ter) PPP2R1A:c.548G>A (p.Arg183Gln) FGFR3 fusion:FGFR3(17) - TACC3(14) Microsatellite Instability (MSI):MSS PD-L1 expression:positive TC<1%, IC 5% Tumor Mutational Burden (TMB):6,63 Muts/MB | positive TC<1%, IC 5% | 6,63  | MSS |
| <u>396</u> | 61 | Female | KRAS c.35G>A p.Gly12Asp SF3B1 c.2098A>G p.Lys700Glu TP53 c.451C>T p.Pro151Ser1                                                                                                                                                                                                | positive TC10% IC<1%  | 0     | MSS |
| <u>397</u> | 69 | Male   | KRAS:c.34G>C (p.Gly12Arg) KRAS:c.183A>C (p.Gln61His) PTEN:c.987_990 delTAAA (p.Asn329LysfsTer14) PTEN:c.955_958delACTT (p.Thr319Ter) TP53:c.380C>T (p.Ser127Phe) TP53:c.701A>G (p.Tyr234Cys)                                                                                  | negative TC<1% IC<1%  | 16,38 | MSS |
| <u>398</u> | 65 | Female | KRAS:c.35G>A (p.Gly12Asp) ERBB2:amplification                                                                                                                                                                                                                                 | negative TC<1%, IC<1% | 0     | MSS |
| <u>399</u> | 77 | Female | KRAS:c.35G>A (p.Gly12Asp) ARID2:c.1189C>T (p.Gln397Ter) TP53:c.683_686del (p.Asp228ValfsTer18)                                                                                                                                                                                | negative TC<1% IC<1%  | 4,78  | MSS |

|            |    |      |                                                             |                             |      |     |
|------------|----|------|-------------------------------------------------------------|-----------------------------|------|-----|
| <u>400</u> | 65 | Male | KRAS:c.35G>A<br>(p.Gly12Asp) TP53:c.743G>A<br>(p.Arg248Gln) | negative <br>TC<1%<br>IC<1% | 5,72 | MSS |
|------------|----|------|-------------------------------------------------------------|-----------------------------|------|-----|
